# Supplementary material for: Attitudes to in vitro meat: A survey of potential consumers in the United States
Source: PLoS One. 2017 Feb 16;12(2):e0171904. doi: 10.1371/journal.pone.0171904 (PMC5312878; doi:10.1371/journal.pone.0171904)
Supplement: S1 Dataset — (XLSX) [file pone.0171904.s001.xlsx]

## Sheet: Attitudes to IVM - PLOSONE - S2
Q62	Q66	Q64	Q59	Q2	Q2_TEXT	Q58_1	Q60_1	Q4	Q5	Q6	Q6_TEXT	Q54_1	Q7	Q8	Q31	Q10	Q11	Q12	Q13	Q14	Q17	Q18	Q50	Q19	Q23	Q24	Q46	Q47	Q53	Q22	Q69_1	Q69_2	Q69_3	Q69_4	Q69_4_TEXT	Q25_1	Q25_2	Q25_3	Q25_4	Q25_5	Q25_6	Q25_7	Q43_1	Q43_2	Q43_3	Q43_4	Q43_5	Q43_6	Q43_7
Attitudes towards Meat Consumption The purpose of the study This study is examining people's...	I have read and understand the conditions of the study. I understand that participation is comple...	I am over 18.	Please state your age (in years).	What is your gender?	What is your gender? -TEXT	In political matters, people sometimes talk about the "left" and the "right". Where would you pla...-Left:Right	In political matters, values are generally considered either "liberal" or "conservative". Which s...-Liberal:Conservative	What is your income per annum?	What is your highest level of completed education?	What are your eating habits?	What are your eating habits? -TEXT	What percentage of your diet is made up of meat? -Please drag the bar to the appropriate position	Have you heard the term in vitro meat before?	Do you know what in vitro meat is?	In vitro meat is an animal flesh product that has never been part of a living animal, but is inst...	The next questions are going to ask about your perceptions of in vitro meat compared to meat that...	How healthy do you think in vitro meat is compared to farmed meat?	How natural do you think in vitro meat is compared to farmed meat?	How environmentally friendly do you think in vitro meat is compared to farmed meat?	How ethical do you think in vitro meat is compared to farmed meat?	How appealing do you think in vitro meat is compared to farmed meat?	How tasty do you think in vitro meat would be compared to farmed meat?	How much of a risk do you think there would be for zoonosis (infectious disease transfer from ani...	For the following questions, please imagine that in vitro meat is commercially available in super...	On a global level, to what extent do you think meeting demand for meat using in vitro methods wou...	Would you be willing to try in vitro meat?	Would you be willing to eat in vitro meat regularly?	Would you be willing to eat in vitro meat as a replacement for farmed meat?	How willing would you be to eat in vitro meat compared to meat substitutes (i.e. made from soy)?	If you were to buy in vitro meat, how much would you be willing to pay for it compared to farmed...	Why might you be unwilling to try in vitro meat? Select all that apply. -Ethical concerns	Why might you be unwilling to try in vitro meat? Select all that apply. -Religious reasons	Why might you be unwilling to try in vitro meat? Select all that apply. -Taste/appeal of the product	Why might you be unwilling to try in vitro meat? Select all that apply. -Other (please specify)	Why might you be unwilling to try in vitro meat? Select all that apply. -Other (please specify)-TEXT	What types of meat do you currently eat? (Please tick all that apply)-Fish and seafood	What types of meat do you currently eat? (Please tick all that apply)-Poultry	What types of meat do you currently eat? (Please tick all that apply)-Bacon, ham and/or pork	What types of meat do you currently eat? (Please tick all that apply)-Beef	What types of meat do you currently eat? (Please tick all that apply)-Horse	What types of meat do you currently eat? (Please tick all that apply)-Dog and/or cat	What types of meat do you currently eat? (Please tick all that apply)-None	What types of meat would you be willing to eat if they were produced using in vitro methods? (Ple...-Fish and other seafood	What types of meat would you be willing to eat if they were produced using in vitro methods? (Ple...-Poultry	What types of meat would you be willing to eat if they were produced using in vitro methods? (Ple...-Bacon, ham and/or pork	What types of meat would you be willing to eat if they were produced using in vitro methods? (Ple...-Beef	What types of meat would you be willing to eat if they were produced using in vitro methods? (Ple...-Horse	What types of meat would you be willing to eat if they were produced using in vitro methods? (Ple...-Dog and/or cat	What types of meat would you be willing to eat if they were produced using in vitro methods? (Ple...-None
1	2	2	33	1		7	7	3	6	1		70	1	1	1	1	3	4	1	1	2	3	3	1	2	1	1	1	1	2				1	Global Warming	1	1	1	1				1	1	1	1
1	2	2	57	2		6	6	4	7	1		30	2	4	1	1	3	5	2	1	4	3	5	1	2	2	3	3	2	2			1			1	1	1	1				1	1	1	1
1	2	2	28	1		4	4	3	7	1		40	1	2	1	1	3	5	2	1	3	3	5	1	2	2	2	2	3	3			1			1	1	1	1				1	1	1	1
1	2	2	29	2		1	1	1	6	1		13	1	1	1	1	1	5	1	1	1	1	5	1	1	1	1	1	1	4			1				1	1	1				1	1	1	1	1	1
1	2	2	31	1		5	5	3	6	1		40	2	2	1	1	3	4	1	1	3	3	4	1	2	1	2	2	3	4			1	1	Price	1	1	1	1				1	1	1	1
1	2	2	30	1		5	5	1	5	1		30	2	3	1	1	3	5	3	3	2	3	4	1	2	2	3	3	2	2			1			1	1	1	1				1	1	1	1
1	2	2	48	2		5	5	2	5	1		25	2	5	1	1	3	5	4	3	5	5	3	1	5	4	4	4	3	5	1		1				1	1	1										1
1	2	2	32	1		5	3	4	7	1		60	1	2	1	1	4	5	3	5	5	4	2	1	3	3	4	4	3	5	1	1				1	1		1				1	1		1
1	2	2	31	2		4	3	2	6	1		56	2	3	1	1	2	4	2	1	3	4	4	1	4	2	3	3	2	2			1	1	Health concerns	1	1	1	1				1	1	1	1
1	2	2	27	1		6	6	1	4	1		40	1	2	1	1	5	5	1	2	5	4	5	1	2	2	4	5	4	4			1	1	safety	1	1	1	1					1	1	1
1	2	2	32	1		4	4	3	5	1		20	1	3	1	1	3	5	1	2	4	3	4	1	4	1	3	2	1	4			1			1	1	1	1				1	1	1	1
1	2	2	40	1		6	8	1	4	1		60	3	4	1	1	4	5	3	4	5	5	4	1	5	2	4	5	3	5			1	1	just feels wrong	1	1	1	1						1	1
1	2	2	24	1		1	1	6	6	2		51	3	4	1	1	2	4	2	1	2	4	4	1	2	2	2	2	4	2	1		1				1							1
1	2	2	38	1		4	4	2	4	1		80	2	5	1	1	1	2	1	1	2	3	5	1	3	1	1	1	1	3				1	lack of variety		1	1	1					1	1	1
1	2	2	37	1		2	2	5	6	1		37	1	1	1	1	2	5	1	1	3	4	5	1	1	1	3	2	1	4			1			1	1	1	1				1	1	1	1	1
1	2	2	67	2		4	4	3	6	1		60	2	5	1	1	3	3	2	2	3	4	5	1	1	2	2	4	1	4			1			1	1	1	1				1	1	1	1
1	2	2	36	1		1	1	1	4	1		60	2	5	1	1	4	5	3	3	5	5	2	1	3	5							1	1	safety concerns	1	1	1	1										1
1	2	2	39	2		3	3	6	6	1		30	2	5	1	1	5	5	1	3	5	5	5	1	1	4	5	5	5	5				1	long term side effects	1	1	1	1										1
1	2	2	19	1		3	2	1	6	1		20	1	2	1	1	2	4	1	1	4	4	5	1	5	1	2	2	2	4	1		1			1	1	1	1					1	1	1
1	2	2	31	1		6	6	5	4	1		30	2	3	1	1	3	4	2	4	4	3	4	1	2	1	2	2	2	4	1					1	1	1	1				1	1	1	1
1	2	2	30	2		2	2	2	5	1		40	3	3	1	1	5	5	3	3	5	5	4	1	1	5							1				1	1	1										1
1	2	2	28	1		5	6	2	4	1		52	1	3	1	1	2	4	1	1	3	3	5	1	2	2	3	4	1	4			1			1	1	1	1					1	1	1
1	2	2	52	1		6	6	3	7	1		45	2	3	1	1	3	4	1	3	3	3	5	1	2	1	2	2	3	4			1			1	1	1	1				1	1	1	1
1	2	2	26	1		2	2	1	3	1		61	2	5	1	1	5	3	3	2	3	4	4	1	4	1	3	3	1	1			1				1	1	1					1	1	1
1	2	2	26	1		2	1	6	6	1		39	1	2	1	1	2	4	1	1	5	3	4	1	4	1	2	2	1	2	1		1			1	1	1	1				1	1	1	1
1	2	2	27	2		5	5	1	4	1		40	1	2	1	1	3	3	1	1	3	3	5	1	1	2	2	2	3	2			1			1	1						1	1	1	1
1	2	2	33	1		6	6	2	4	1		30	2	4	1	1	3	4	2	2	4	4	4	1	2	2	3	3	2	3			1			1	1	1	1				1	1	1	1
1	2	2	38	1		7	6	3	7	1		30	1	2	1	1	4	5	2	2	4	3	3	1	5	1	3	4	5	5				1	More research on nutrition	1	1		1					1		1
1	2	2	34	2		7	7	4	6	1		20	2	5	1	1	2	5	1	3	4	5	4	1	2	2	3	2	3	4			1			1	1	1	1					1	1	1
1	2	2	40	1		5	5	4	4	1		60	2	4	1	1	2	4	2	2	2	3	5	1	4	1	1	1	1	3			1			1	1	1	1				1	1	1	1
1	2	2	20	1		9	9	1	4	1		45	2	3	1	1	2	5	1	1	4	3	5	1	2	1	2	4	1	4			1			1	1	1	1							1
1	2	2	22	1		9	9	1	4	1		70	2	4	1	1	5	5	2	4	5	5	2	1	5	4	5	5	4	5	1	1	1			1	1	1	1										1
1	2	2	38	2		8	8	1	7	1		30	2	2	1	1	5	5	2	5	5	3	4	1	2	5						1	1			1	1	1	1										1
1	2	2	22	1		8	8	2	6	1		50	2	5	1	1	5	5	5	5	5	5	1	1	1	5					1		1			1	1	1	1										1
1	2	2	20	1		5	5	2	4	1		40	1	3	1	1	2	3	1	1	4	4	4	1	4	1	2	3	1	3			1			1	1	1	1				1	1	1	1	1	1
1	2	2	40	2		2	2	5	6	1		43	1	2	1	1	4	5	4	2	4	5	5	1	2	1	2	2	3	4	1		1	1	synthetic ingredients	1	1	1	1				1	1	1	1
1	2	2	25	2		4	4	1	4	1		46	2	2	1	1	2	4	1	1	2	3	5	1	4	1	3	2	2	3	1					1	1	1	1				1	1	1	1	1
1	2	2	42	2		6	6	1	4	1		31	2	5	1	1	3	5	2	2	4	5	4	1	4	2	3	3	3	4	1		1			1	1	1	1				1	1	1	1
1	2	2	27	2		5	5	2	7	1		20	2	3	1	1	2	3	1	2	5	5	3	1	1	1	2	3	3	2			1			1	1	1	1				1	1	1	1
1	2	2	46	1		8	3	3	6	1		70	3	3	1	1	5	5	2	3	4	5	4	1	2	4	4	4	5	5				1	I would feel it is synthetic		1	1	1						1
1	2	2	26	2		6	6	4	6	4			2	5	1	1	4	5	3	2	4	3	5	1	4	5								1	Vegetarian							1							1
1	2	2	42	2		9	9	3	7	1		50	2	5	1	1	3	5	4	3	4	4	4	1	2	1	3	3	3	3			1			1	1	1	1				1	1	1	1
1	2	2	28	1		6	7	3	7	1		30	1	1	1	1	5	5	2	3	5	5	2	1	2	5							1	1	Health concerns	1	1	1	1										1
1	2	2	30	1		1	1	2	5	1		40	2	3	1	1	3	4	1	1	4	4	4	1	3	3	3	3	3	3			1			1	1	1	1					1	1	1
1	2	2	35	2		4	6	4	7	1		67	1	2	1	1	4	5	1	4	5	4	5	1	1	2	3	3	2	4			1			1	1	1	1					1		1
1	2	2	21	2		5	8	1	4	1		50	1	2	1	1	5	5	3	3	5	5	5	1	1	3	5	5	3	4			1			1	1	1	1										1
1	2	2	33	1		1	1	3	4	1		40	2	3	1	1	3	3	2	1	2	3	5	1	4	1	1	1	1	2			1			1	1	1	1				1	1	1	1	1	1
1	2	2	40	2		8	8	2	6	1		25	2	5	1	1	4	5	2	5	5	5	4	1	1	5					1		1			1	1	1	1										1
1	2	2	30	2		3	3	1	7	1		75	2	3	1	1	2	3	2	1	1	3	3	1	5	1	3	3	2	2			1			1	1	1	1				1	1	1	1
1	2	2	20	2		6	6	1	4	1		33	2	5	1	1	3	5	2	1	3	4	4	1	3	1	2	3	2	3						1	1		1					1		1
1	2	2	23	1		4	3	1	4	1		33	2	3	1	1	2	5	1	1	2	4	3	1	1	2	4	4	3	5				1	value - protein cost/ cost ratio comparison	1	1	1	1						1
1	2	2	27	1		3	2	1	6	1		65	3	2	1	1	3	4	1	1	2	3	4	1	5	1	2	2	1	3			1	1	Price		1	1	1							1
1	2	2	25	2		5	5	2	4	1		50	2	3	1	1	2	5	4	4	5	5	4	1	5	4	4	5	4	4			1			1	1	1	1										1
1	2	2	35	1		7	5	6	7	1		30	1	2	1	1	3	3	2	3	3	4	5	1	1	1	1	1	1	4			1			1	1	1	1				1	1	1	1	1	1
1	2	2	32	2		5	5	3	7	1		40	2	3	1	1	2	5	2	3	5	4	2	1	3	5								1	mutations	1	1	1	1										1
1	2	2	25	1		6	6	4	6	1		50	1	2	1	1	2	5	1	1	5	5	5	1	5	1	2	2	1	3				1	Too expensive	1	1	1	1				1	1	1	1
1	2	2	22	1		4	3	6	4	1		18	2	2	1	1	1	4	1	2	3	3	5	1	1	1	2	3	2	5			1			1	1	1	1					1	1	1
1	2	2	30	1		1	1	4	3	4		0	2	5	1	1	3	4	1	1	1	3	4	1	2	5								1	i'm a vegetarian							1							1
1	2	2	46	2		9	9	5	6	1		30	3	3	1	1	3	5	1	3	5	5	4	1	2	4	5	5	2	3	1		1			1	1	1	1										1
1	2	2	24	1		6	6	3	6	1		25	2	4	1	1	4	4	2	3	4	4	5	1	5	2	4	4	2	3			1			1	1	1	1					1	1	1
1	2	2	58	2		5	5	5	6	6		45	2	3	1	1	4	4	2	2	2	2	3	1	4	2	3	3	3	3	1					1	1	1	1			1	1	1	1	1
1	2	2	52	2		1	1	3	6	1		61	2	5	1	1	3	4	3	3	4	4	2	1	1	4	4	5	5	2			1				1	1	1										1
1	2	2	27	1		4	4	2	6	1		50	1	2	1	1	3	4	2	1	4	4	3	1	1	1	2	2	1	3						1	1	1	1				1	1	1	1
1	2	2	28	3		1	1	1	6	6	gluten free, alcohol free, vegetarian	0	3	3	1	1	5	5	5	3	5	3	2	1	5	5					1	1	1	1	I'm vegetarian and anti gmo							1							1
1	2	2	49	2		4	5	2	5	1		15	1	2	1	1	5	5	5	5	5	5	3	1	5	4	4	4	5	5	1	1	1			1			1										1
1	2	2	43	2		4	4	4	6	1		71	2	5	1	1	2	5	2	2	5	4	2	1	2	3	3	3	2	5			1			1	1	1	1							1
1	2	2	27	2		1	1	5	6	1		20	1	2	1	1	2	4	1	1	4	4	5	1	2	1	3	3	2	3			1			1	1	1	1				1	1	1	1
1	2	2	21	1		7	6	1	4	1		65	2	4	1	1	4	5	1	4	3	4	4	1	2	2	4	5	3	4	1		1			1			1										1
1	2	2	35	1		5	5	3	4	1		51	2	3	1	1	4	5	4	3	5	5	4	1	4	5							1			1	1	1	1										1
1	2	2	36	1		4	4	5	7	1		35	2	5	1	1	3	5	2	3	5	4	5	1	4	3	3	3	4	5			1			1	1	1	1				1	1	1	1
1	2	2	19	1		8	8	2	4	1		27	3	4	1	1	1	4	2	1	2	5	2	1	1	2	2	3	1	4			1			1		1	1				1		1	1
1	2	2	33	1		1	1	5	7	1		30	1	1	1	1	1	3	2	1	1	4	3	1	3	1	2	1	3	2	1		1			1	1	1	1				1	1	1	1
1	2	2	33	2		4	3	2	4	3		6	2	4	1	1	2	4	3	2	3	3	4	1	4	3	3	2	4	3	1			1	I don't eat meat for health reasons, particularly those high in bad fats and cholesterol	1						1	1
1	2	2	43	1		2	2	1	4	1		40	2	5	1	1	4	5	2	1	4	3	5	1	2	1	3	2	2	4			1			1	1	1	1				1	1	1	1
1	2	2	60	2		4	3	6	7	1		45	2	5	1	1	3	4	1	3	4	4	4	1	2	3	3	3	4	4				1	Unsure of health quality	1	1	1	1				1
1	2	2	42	2		8	8	4	6	1		30	2	4	1	1	4	4	2	4	4	3	3	1	3	4	4	4	4	4	1		1			1	1	1	1										1
1	2	2	39	1		6	6	4	6	1		50	3	3	1	1	4	5	4	4	5	5	2	1	2	5					1		1	1	grown in a laboratory	1	1		1										1
1	2	2	32	1		6	5	2	4	1		40	2	5	1	1	3	5	2	3	4	4	5	1	4	1	3	3	2	3			1			1	1	1	1				1	1	1	1
1	2	2	26	2		1	1	1	6	4		0	2	5	1	1	4	5	1	1	2	4	5	1	4	5							1	1	I think meat in general is unhealthy.							1							1
1	2	2	25	2		5	7	2	3	1		37	2	4	1	1	3	3	1	1	5	5	2	1	3	3	4	4	4	4			1				1	1	1						1
1	2	2	31	1		3	2	3	6	1		20	2	4	1	1	3	5	1	1	5	5	5	1	4	2	3	3	4	5			1			1	1	1	1					1		1
1	2	2	62	2		2	2	1	4	1		61	2	2	1	1	2	4	2	4	4	5	3	1	4	5						1	1	1	seems unnatural	1	1	1	1				1
1	2	2	36	1		6	4	1	6	1		30	2	4	1	1	4	5	4	3	2	3	5	1	1	2	3	4	3	5	1		1			1	1		1							1
1	2	2	30	2		4	6	3	6	1		40	2	5	1	1	2	4	1	2	4	3	4	1	5	2	3	3	3	3			1			1	1	1	1					1	1	1
1	2	2	55	2		8	8	1	7	1		25	1	1	1	1	5	5	5	5	5	4	1	1	5	4	5	5	5	5			1	1	Lack of nutrition		1	1	1										1
1	2	2	24	2		4	4	1	6	1		71	3	4	1	1	3	4	1	1	3	3	5	1	2	2	3	2	3	3			1				1	1	1					1	1	1
1	2	2	28	2		8	8	3	6	1		26	2	5	1	1	3	5	2	2	5	5	2	1	4	2	3	3	1	3			1			1	1	1	1				1	1	1	1
1	2	2	45	2		2	2	2	6	2		31	2	2	1	1	4	4	2	2	4	4	5	1	5	2	3	3	3	2	1					1	1		1					1	1
1	2	2	26	1		3	4	3	6	1		30	3	3	1	1	3	5	2	2	3	4	4	1	2	1	3	2	3	4				1	health concern	1	1	1	1				1	1	1	1
1	2	2	27	2		6	7	4	6	1		41	2	2	1	1	3	4	2	3	4	4	4	1	4	4	4	3	4	3	1		1			1	1												1
1	2	2	21	2		3	3	2	4	1		73	1	2	1	1	3	5	1	2	3	3	5	1	2	1	2	2	1	3			1			1	1	1	1				1	1	1	1
1	2	2	43	2		7	7	5	6	1		61	2	3	1	1	4	5	3	4	5	5	2	1	2	3	4	4	3	5			1			1	1	1	1						1
1	2	2	27	1		5	5	1	6	1		65	2	5	1	1	3	4	2	3	4	3	3	1	4	2	3	3	2	3			1				1	1	1					1	1	1
1	2	2	26	2		5	5	2	6	1		75	2	3	1	1	5	5	4	5	5	1	1	1	1	5					1					1	1	1	1										1
1	2	2	28	2		3	2	1	4	4		0	1	2	1	1	3	3	2	1	1	4	5	1	4	2	3	6	4	2				1	health concerns							1	1			1
1	2	2	34	2		3	3	4	7	4		20	3	2	1	1	4	5	2	4	4	4	2	1	2	4	4	5	5	5	1		1	1	eating meat is not an end to itself	1													1
1	2	2	41	1		2	2	3	6	1		25	3	4	1	1	2	5	1	2	5	5	5	1	2	2	3	4	2	4			1			1	1	1	1				1	1	1	1
1	2	2	24	1		5	5	2	4	1		74	3	3	1	1	1	4	1	3	1	4	4	1	1	1	1	1	1	2			1			1		1	1				1		1	1
1	2	2	50	2		8	8	1	6	1		20	2	5	1	1	3	5	2	2	4	4	4	1	4	4	4	4	4	4			1			1	1	1	1										1
1	2	2	31	2		4	4	1	6	1		5	2	4	1	1	3	4	2	1	5	3	4	1	4	3	3	3	4	3			1			1	1	1	1				1	1	1	1
1	2	2	23	1		5	3	3	6	1		40	2	3	1	1	4	5	5	5	5	5	1	1	2	5					1	1	1			1	1		1										1
1	2	2	35	2		5	6	3	6	1		71	1	2	1	1	3	4	3	3	5	4	4	1	4	2	4	2	3	4			1			1	1	1	1					1		1
1	2	2	28	2		1	1	1	6	1		75	2	4	1	1	3	5	2	1	4	5	2	1	4	3	4	3	3	3			1			1	1	1	1				1	1	1	1
1	2	2	37	2		7	7	5	6	1		31	2	4	1	1	3	5	2	4	5	5	4	1	5	5							1			1	1	1	1										1
1	2	2	50	2		8	8	4	7	1		10	1	2	1	1	2	4	1	2	2	3	3	1	4	2	2	3	4	2	1						1	1						1	1	1
1	2	2	29	2		1	1	3	6	1		30	1	2	1	1	2	4	1	1	2	3	5	1	2	1	2	2	3	3			1			1	1	1	1					1	1	1
1	2	2	45	2		3	3	2	5	1		41	2	5	1	1	4	5	2	3	5	5	3	1	2	3	5	4	2	4			1			1	1	1	1				1	1	1	1
1	2	2	24	1		7	7	2	6	1		30	1	2	1	1	3	4	2	3	3	3	4	1	4	2	3	2	1	3			1			1	1	1	1						1	1
1	2	2	34	2		9	9	4	4	1		34	2	3	1	1	4	4	3	3	4	4	3	1	4	4	4	4	3	3			1			1	1	1	1										1
1	2	2	34	1		1	1	4	7	3		3	1	2	1	1	3	3	2	3	3	3	3	1	2	1	3	2	2	3	1					1	1						1	1		1
1	2	2	35	1		5	5	1	4	1		35	2	3	1	1	3	3	1	1	2	3	5	1	4	1	1	1	1	3			1			1	1	1	1				1	1	1	1
1	2	2	32	1		2	2	1	6	1		50	2	2	1	1	3	5	1	1	1	3	5	1	2	1	1	1	1	3	1			1	Environmental concerns and rising costs	1	1	1	1				1	1	1	1
1	2	2	32	2		5	5	4	6	1		25	1	2	1	1	2	3	1	1	2	3	5	1	1	1	2	1	2	4			1			1	1	1	1				1	1	1	1
1	2	2	25	1		5	5	2	4	1		50	2	5	1	1	3	5	1	5	5	3	5	1	1	3	3	3	2	4			1				1	1	1					1	1	1
1	2	2	51	1		4	4	1	5	1		30	2	4	1	1	3	4	1	2	3	4	5	1	2	2	3	2	2	4			1			1	1	1	1				1	1	1	1
1	2	2	23	1		3	3	1	5	1		33	1	1	1	1	3	5	1	1	4	4	5	1	5	1	2	2	1	3			1			1	1	1	1				1	1	1	1
1	2	2	22	1		5	5	1	4	1		46	1	3	1	1	3	5	5	2	4	3	5	1	3	2	3	3	2	4			1			1	1	1	1				1	1	1	1
1	2	2	51	1		9	9	6	7	1		33	1	1	1	1	3	5	3	5	4	4	5	1	5	3	4	4	4	5	1		1			1	1	1	1				1	1	1	1
1	2	2	39	1		5	3	3	4	1		20	2	3	1	1	3	5	1	2	3	3	4	1	1	1	2	2	2	4			1			1	1	1	1				1	1	1	1
1	2	2	53	2		9	9	1	7	1		9	1	1	1	1	3	4	3	3	5	4	4	1	5	2	4	4	2	4			1			1	1	1	1				1	1	1	1
1	2	2	25	1		4	4	2	4	1		40	1	4	1	1	2	5	1	1	3	4	5	1	4	1	2	2	1	3			1			1	1	1	1				1	1	1	1
1	2	2	36	2		5	5	6	6	1		50	3	4	1	1	4	4	3	2	5	3	4	1	4	4	4	4	4	5			1	1	I think farm to fork is healthier.		1	1	1							1
1	2	2	33	2		5	5	2	4	1		72	1	3	1	1	3	4	3	3	3	3	3	1	3	1	2	2	1	3			1			1	1	1	1				1	1	1	1
1	2	2	28	1		6	6	4	7	1		50	2	5	1	1	2	5	1	1	2	4	5	1	2	1	3	3	1	3			1			1	1	1	1				1	1	1	1
1	2	2	58	1		6	6	2	7	1		35	3	3	1	1	3	5	2	2	4	4	4	1	2	2	4	4	2	4			1			1	1	1	1				1			1
1	2	2	31	2		8	8	3	5	1		40	1	1	1	1	3	5	1	1	5	5	3	1	5	4	4	5	5	3			1			1	1	1	1										1
1	2	2	29	1		2	2	3	6	1		40	2	2	1	1	3	4	2	1	2	3	4	1	4	1	1	1	1	2	1					1	1	1					1	1	1	1
1	2	2	44	1		5	4	3	4	1		62	1	2	1	1	3	3	1	2	4	3	4	1	2	1	2	2	2	4			1			1	1	1	1				1	1	1	1
1	2	2	22	2		1	1	1	6	1		15	3	5	1	1	3	4	1	1	4	4	4	1	4	1	2	3	2	3	1		1			1	1	1	1				1	1	1	1
1	2	2	33	2		7	7	5	6	1		25	2	2	1	1	3	5	2	3	5	5	4	1	4	4	5	5	3	5	1					1	1	1	1										1
1	2	2	28	1		4	4	1	4	1		50	2	5	1	1	4	5	1	2	5	5	2	1	4	3	4	5	4	3	1		1			1	1	1	1
1	2	2	30	1		4	5	3	7	1		25	2	1	1	1	2	5	1	1	3	4	5	1	2	1	2	2	1	3			1			1	1	1	1				1	1	1	1
1	2	2	33	1		5	5	2	6	1		80	2	3	1	1	3	4	3	3	3	3	4	1	4	1	3	3	1	3			1				1	1	1				1	1	1	1	1
1	2	2	30	1		7	7	4	5	1		67	2	3	1	1	3	5	3	3	5	3	3	1	4	5					1					1	1	1	1										1
1	2	2	36	1		2	1	3	7	1		30	3	3	1	1	4	5	2	3	4	3	3	1	2	1	3	3	3	3				1	Newness of the product	1	1		1					1		1
1	2	2	40	2		6	6	5	6	1		31	2	5	1	1	3	4	3	4	4	4	3	1	4	2	3	3	4	3	1					1	1	1	1					1	1	1
1	2	2	58	2		3	3	5	6	1		30	2	3	1	1	2	2	2	2	4	4	4	1	2	2	3	3	1	4	1		1			1	1	1	1				1	1	1	1
1	2	2		1		4	4	2	6	4		0	1	2	1	1	3	4	1	1	4	3	5	1	4	2	4	3	4	3			1									1			1	1
1	2	2	57	2		8	8	1	5	4		0	1	2	1	1	4	5	3	3	5	4	2	1	2	5						1	1	1	don't eat meat anymore							1							1
1	2	2	46	1		8	8	2	5	1		19	1	2	1	1	4	5	2	1	4	3	3	1	2	2	3	3	3	4			1				1		1					1		1
1	2	2	20	1		5	5	1	4	1		50	2	3	1	1	3	5	2	3	5	5	4	1	4	2	3	3	3	3			1			1	1	1	1				1	1	1	1
1	2	2	47	2		2	2	4	6	1		20	2	3	1	1	3	4	3	1	4	5	1	1	4	4	4	4	4	5			1			1	1	1											1
1	2	2	32	1		2	2	3	7	1		30	1	3	1	1	3	4	2	3	5	3	4	1	5	2	3	4	3	3			1			1	1	1	1				1	1	1	1
1	2	2	24	1		5	5	2	4	1		60	2	2	1	1	3	5	2	1	4	4	5	1	3	3	3	3	4	4			1			1	1	1	1				1	1	1	1
1	2	2	40	2		3	4	1	6	1		40	2	3	1	1	3	5	2	3	5	4	4	1	3	5					1		1				1	1	1										1
1	2	2	40	2		3	3	2	6	5		0	1	2	1	1	5	5	3	5	5	5	4	1	2	5					1	1	1									1							1
1	2	2	23	1		3	3	4	6	1		70	1	2	1	1	3	4	1	3	4	4	4	1	2	2	3	4	1	4			1				1	1	1					1	1	1
1	2	2	58	2		8	8	2	6	1		20	2	5	1	1	5	5	5	5	5	5	3	1	3	5							1			1	1	1	1										1
1	2	2	38	2		2	2	4	6	1		15	2	5	1	1	4	4	2	1	5	4	4	1	4	2	4	4	2	2			1	1	skepticism	1	1		1				1	1		1
1	2	2	39	1		6	6	3	6	1		37	1	2	1	1	3	3			1	2	4	1	2	1	1	2	1	2			1			1	1		1				1	1		1
1	2	2	30	1		3	3	3	4	1		30	2	4	1	1	2	4	3	3	4	3	4	1	4	2	3	3	3	2			1			1	1	1	1				1	1	1	1
1	2	2	35	1		2	2	2	7	3		10	3	3	1	1	2	4	1	1	2	3	5	1	4	2	3	6	4	2			1			1							1	1	1	1
1	2	2	27	1		3	3	2	6	1		30	3	3	1	1	4	5	2	3	4	4	4	1	2	1	3	3	2	5						1	1	1	1				1	1	1	1
1	2	2	28	2		8	8	1	6	1		20	2	2	1	1	3	5	2	2	5	4	5	1	4	2	3	3	3	2			1			1	1	1	1				1	1	1	1
1	2	2	23	2		1	1	1	4	1		40	2	5	1	1	3	4	2	2	5	4	4	1	4	2	2	2	2	4			1	1	price	1	1	1	1				1	1	1	1
1	2	2	32	2		8	8	3	6	1		50	2	4	1	1	4	4	3	3	5	5	2	1	3	4	3	4	3	5			1			1	1	1	1					1		1
1	2	2	42	2		6	6	6	6	1		81	2	5	1	1	3	5	4	3	5	4	5	1	3	4	4	4	3	4				1	Concerns regarding the viability and enviromental concerns regarding the production of this meat	1	1	1	1							1
1	2	2	51	1		8	8	1	5	1		44	2	4	1	1	3	4	2	1	1	2	5	1	2	3	3	3	4	4				1	do not have any long term studies citing safety concerns of product	1	1	1	1				1	1	1	1
1	2	2	33	2		7	7	4	6	1		30	2	5	1	1	4	5	4	3	5	5	2	1	4	4	5	5	3	3	1		1				1	1	1										1
1	2	2	35	2		2	2	3	6	1		20	2	5	1	1	2	5	2	3	4	4	5	1	2	2	2	2	1	4	1					1		1	1					1	1	1
1	2	2	32	2		1	1	3	6	6	Eat poultry and fish only (I wasn't sure if you were considering pork to be 'white' meat, and I do not eat pork).	20	2	4	1	1	3	4	2	1	2	3	4	1	2	3	3	6	4	4			1			1	1						1	1
1	2	2	26	1		6	6	3	7	1		34	1	2	1	1	3	4	2	3	4	4	5	1	4	2	3	3	2	3			1			1	1	1	1				1	1	1	1
1	2	2	24	1		6	6	3	6	1		25	1	2	1	1	4	5	1	2	4	3	5	1	2	1	2	3	3	4						1	1	1	1							1
1	2	2	29	2		3	2	1	4	1		30	1	1	1	1	3	5	2	3	5	3	5	1	5	3	4	4	3	3			1			1	1	1	1				1	1	1	1
1	2	2	35	2		4	1	1	6	5		0	2	5	1	1	2	3	1	1	2	2	5	1	1	4	4	6	4	4				1	Physical concerns - might get sick eating it after not having meat for so long, plus there could still be the potential for all the same hazards of eating meat (increased risk for cancers, etc.)							1							1
1	2	2	24	2		2	2	1	6	4		0	1	3	1	1	2	3	1	1	1	3	4	1	4	2	4	3	3	2	1		1									1	1		1
1	2	2	23	2		2	2	1	6	2		35	1	2	1	1	4	5	1	1	2	4	5	1	2	2	2	2	3	4			1			1	1						1	1
1	2	2	21	2		4	3	1	6	1		40	2	3	1	1	4	5	2	3	5	5	5	1	4	4	5	5	5	5			1			1	1	1	1							1
1	2	2	26	2		5	5	1	4	1		50	2	3	1	1	3	4	2	1	4	5	5	1	4	2	2	3	3	4	1					1	1		1							1
1	2	2	31	1		1	1	6	7	1		45	3	3	1	1	3	5	1	1	3	3	5	1	1	1	2	2	3	5			1			1	1	1	1				1	1	1	1	1
1	2	2		2		4	4	6	7	1		33	2	2	1	1	2	3	1	1	2	3	4	1	1	1	1	1	1	2	1		1			1	1		1					1		1
1	2	2	34	2		7	6	3	6	1		29	2	3	1	1	4	3	1	3	3	4	4	1	4	4	4	4	4	3	1		1			1	1		1										1
1	2	2	26	1		3	3	2	6	1		20	1	1	1	1	3	5	2	2	3	4	4	1	4	1	2	2	1	3			1			1	1	1	1				1	1	1	1
1	2	2	29	2		5	5	5	6	1		50	2	3	1	1	5	5	2	5	5	5	4	1	5	5					1		1	1	I feel that a lot of harm has already come to our society by all of the added preservatives in foods aready. I dont have much faith in the FDA regulation in its current state, and would not think that it would regulate the in vitro meat very well. I also think that eating fake un natural foods like this is what is causing so many new illnesses and cancers in this generation. Therefore, I wouldn't…	1	1	1	1										1
1	2	2	26	2		2	2	2	6	3		17	1	2	1	1	2	4	2	1	1	3	4	1	3	1	1	1	2	2			1			1	1						1	1
1	2	2	50	2		1	1	3	6	1		20	2	5	1	1	3	5	1	1	4	5	5	1	4	1	2	2	3	3			1			1	1	1	1				1	1	1	1
1	2	2	27	1		4	4	1	6	1		35	3	5	1	1	3	3	1	1	3	4	3	1	4	1	2	3	2	2			1			1	1	1	1				1	1	1	1
1	2	2	55	1		7	7	6	4	1		20	2	5	1	1	4	5	2	2	5	3	1	1	1	2	4	4	3	4			1	1	Safety of the product	1	1		1										1
1	2	2	35	1		5	5	1	4	1		35	3	5	1	1	3	3	2	3	3	2	4	1	5	1	2	2	3	3			1				1	1	1					1	1	1
1	2	2	28	2		1	1	2	4	1		70	2	2	1	1	3	4	1	1	1	2	5	1	4	2	2	2	3	2				1	Concerns of gmos and their future effects or any additives		1	1	1					1	1	1
1	2	2	34	2		3	3	2	6	1		25	2	5	1	1	3	4	2	2	5	4	3	1	4	3	4	4	3	3			1				1	1	1					1	1	1
1	2	2	29	2		6	6	4	6	1		49	2	5	1	1	2	4	1	1	3	3	5	1	4	2	2	2	3	3			1					1	1					1	1	1
1	2	2	35	2		2	2	1	6	1		25	2	5	1	1	3	3	1	1	4	3	4	1	2	2	3	3	3	4	1					1	1	1	1				1	1	1	1
1	2	2	37	2		5	5	6	4	1		33	2	3	1	1	3	5	2	2	4	4	5	1	4	2	3	2	3	4			1			1	1	1	1					1	1	1
1	2	2	31	2		3	3	4	7	1		30	1	1	1	1	4	5	2	4	5	5	4	1	2	5							1			1	1	1	1										1
1	2	2	20	1		1	3	4	4	1		35	1	1	1	1	3	5	4	2	3	3	5	1	2	1	1	1	1	3							1	1	1					1	1	1
1	2	2	34	1		2	2	2	4	1		61	2	3	1	1	3	4	1	2	4	3	5	1	4	1	2	2	1	3				1	none	1	1	1	1				1	1	1	1
1	2	2	48	2		6	6	3	6	1		30	2	4	1	1	5	5	3	5	5	5	2	1	4	5							1	1	It just doesn't seem natural	1	1	1	1										1
1	2	2	21	1		7	7	1	4	1		75	2	5	1	1	2	5	2	2	4	4	5	1	5	1	2	2	2	4			1				1	1	1					1	1	1
1	2	2	30	1		3	2	2	6	1		14	2	4	1	1	3	3	2	2	2	4	4	1	2	1	2	2	3	3			1	1	Cost	1	1	1	1				1	1	1	1	1
1	2	2	24	1		9	9	2	6	1		70	2	3	1	1	5	5	2	5	4	5	3	1	5	4	5	5	5	3	1	1	1			1	1	1	1										1
1	1
1	2	2	19	2		3	2	3	4	1		30	1	2	1	1	3	4	3	2	2	3	5	1	4	1	1	1	4	3	1		1			1	1	1	1				1	1	1	1
1	2	2	25	1		6	6	2	5	1		35	3	3	1	1	2	3	1	1	3	3	5	1	5	2	2	2	1	2			1				1	1	1					1	1	1
1	2	2	36	2		5	4	1	5	1		19	1	4	1	1	3	5	1	2	5	4	5	1	4	2	4	3	4	3			1			1	1	1	1				1	1	1	1
1	2	2	28	2		5	3	4	7	1		34	2	2	1	1	4	4	1	4	4	3	5	1	2	3	3	3	3	4	1		1			1	1	1	1						1	1
1	2	2	31	2		2	2	2	5	1		27	1	2	1	1	3	4	2	2	4	3	5	1	2	2	4	4	3	4			1				1	1	1					1	1	1
1	2	2	18	2		6	3	1	4	1		60	2	4	1	1	3	4	2	4	4	4	2	1	4	2	4	4	4	4	1		1			1	1	1	1					1		1
1	2	2	23	1		3	3	1	6	1		20	1	4	1	1	2	5	2	2	2	2	5	1	4	1	2	3	3	3						1	1	1	1				1	1	1	1
1	2	2	19	1		4	4	1	4	1		30	1	2	1	1	3	4	1	2	3	3	5	1	4	1	2	2	1	2			1			1	1	1	1				1	1	1	1
1	2	2	43	2		5	5	1	7	1		20	3	3	1	1	3	5	1	1	3	3	5	1	2	3	3	3	3	4				1	Health concerns	1	1	1	1										1
1	2	2	24	1		9	9	2	4	1		20	1	4	1	1	3	4	3	3	5	5	5	1	2	2	3	4	2	5			1	1	price, if it's more expensive	1	1	1	1				1	1	1	1
1	2	2	23	1		4	4	1	4	1		40	2	5	1	1	3	3	3	2	4	5	3	1	1	1	1	4	1	3	1		1			1	1	1	1				1	1	1	1	1	1
1	2	2	24	2		5	7	4	4	1		70	2	4	1	1	2	5	2	3	5	4	5	1	4	1	3	2	3	4				1	it just seems unnatural	1	1	1	1				1	1	1	1
1	2	2	29	1		8	8	4	5	1		30	1	2	1	1	1	4	1	2	2	3	3	1	5	1	1	1	2	3	1		1			1	1		1					1		1
1	2	2	53	2		4	4	2	4	1		31	2	3	1	1	5	5	2	5	5	5	5	1	5	5								1	safety of meat	1	1	1	1										1
1	2	2	25	2		1	1	1	4	1		50	2	2	1	1	3	4	3	2	5	5	4	1	1	5					1		1			1	1	1	1										1
1	2	2	21	2		3	4	1	6	1		30	2	4	1	1	3	5	2	1	4	3	4	1	4	2	3	2	3	3			1			1	1	1	1					1	1	1
1	2	2	45	1		8	8	2	5	1		9	2	4	1	1	2	5	1	3	2	3	5	1	2	2	2	2	1	4				1	More humane than our penned up animals that is the biggest part of our meat industry.	1	1	1	1				1	1	1	1
1	2	2	37	3	genderfluid	3	3	1	4	1		25	1	3	1	1	3	4	2	3	4	3	4	1	4	4	4	4	3	4				1	I'd be concerned about potential biological issues such as cancer.	1	1	1	1										1
1	2	2	26	1		6	6	3	7	1		65	2	3	1	1	4	4	4	4	4	5	3	1	2	2	4	5	3	4	1		1	1	How such a product might impact the livelihood of small farmers	1	1	1	1					1	1	1
1	2	2	29	1		5	2	3	6	1		71	2	5	1	1	3	4	1	3	4	4	5	1	2	1	2	2	4	4			1			1	1	1	1				1	1	1	1	1
1	2	2	58	2		5	5	1	4	1		25	2	4	1	1	4	4	2	2	4	4	3	1	2	3	3	3	2	4			1	1	Health concerns								1	1	1	1
1	2	2	26	2		3	3	3	6	1		81	2	3	1	1	3	5	2	2	5	5	4	1	4	3	3	4	4	2			1			1	1	1	1						1	1
1	2	2	43	1		5	5	6	7	1		30	2	3	1	1	3	5	2	2	4	3	3	1	4	4	5	3	3	3			1			1	1	1											1
1	2	2	56	1		7	7	4	6	1		38	1	4	1	1	3	4	2	3	4	4	3	1	4	4	4	5	4	5			1			1	1	1	1							1
1	2	2	34	2		1	1	1	6	1		30	2	5	1	1	3	4	2	2	4	4	4	1	2	3	3	3	4	4			1			1	1	1	1				1	1	1	1
1	2	2	22	1		3	3	1	4	1		20	2	3	1	1	1	3	1	1	1	3	5	1	5	1	2	1	1	1	1		1				1	1						1	1	1
1	2	2	28	2		1	1	2	6	1		92	2	5	1	1	2	1	3	2	1	1	2	1	1	1	2	1	2	1			1			1									1
1	2	2	42	2		5	5	1	4	1		12	2	5	1	1	3	4	2	2	4	4	4	1	4	2	3	4	2	4			1			1	1	1	1				1	1	1	1
1	2	2	35	2		5	5	3	7	1		60	2	2	1	1	4	5	4	2	4	4	5	1	1	2	4	4	4	5			1			1	1	1	1				1	1	1	1
1	2	2	28	2		2	2	2	6	3			2	3	1	1	2	4	1	1	2	3	5	1	4	2	4	6	4	3	1					1								1
1	2	2	46	1		6	6	5	6	1		35	3	2	1	1	2	3	1	2	5	5	4	1	2	3	4	4	2	4			1			1	1	1	1						1	1
1	2	2	21	1		4	4	3	4	1		60	1	1	1	1	4	4	3	3	4	3	2	1	5	2	3	3	2	3			1			1	1	1	1							1
1	2	2	36	1		5	6	2		1		28	1	2	1	1		1	3	1	4	1	2	1	3	2	2	3	4	4			1			1			1		1			1	1	1
1	2	2	36	2		3	3	3	6	1		31	2	4	1	1	4	5	3	2	4	4	4	1	2	2	4	2	4	4			1	1	health	1	1	1	1					1	1	1
1	2	2	28	2		7	8	3	4	1		50	2	3	1	1	4	5	2	1	4	4	5	1	4	2	2	3	2	4	1					1	1	1	1					1	1	1
1	2	2	62	2		9	2	6	6	1		50	1	2	1	1	3	5	2	3	5	4	5	1	2	4	4	4	4	3			1			1	1	1	1										1
1	2	2	25	1		7	6	6	4	1		45	2	4	1	1	4	4	1	1	3	4	4	1	4	1	2	2	2	3			1	1	If it had more negative health implications than regular meat	1	1	1	1				1	1	1	1
1	2	2	34	2		4	3	1	6	1		5	2	3	1	1	3	5	4	3	5	3	4	1	5	4	4	4	5	3				1	it isn't natural	1	1	1	1										1
1	2	2	34	2		7	7	4	4	1		40	2	5	1	1	4	5	4	1	4	4	5	1	4	3	3	3	3	4				1	not enough testing on long-term effects if any	1	1	1	1					1
1	2	2	33	2		5	5	2	7	1		19	1	1	1	1	3	5	4	3	5	4	3	1	5	2	3	4	4	3			1	1	tissue culture is very resource intensive	1	1	1	1				1	1	1	1	1	1
1	2	2	23	1		5	5	1	3	1		38	3	2	1	1	4	4	2	2	3	4	2	1	5	3	3	3	2	5			1			1	1	1	1						1	1
1	2	2	20	1		2	2	1	6	2		31	2	4	1	1	2	4	2	2	3	3	4	1	4	2	2	3	4	4			1				1							1
1	2	2	42	1		4	5	2	6	1		40	2	4	1	1	4	4	2	2	5	4	3	1	3	3	4	3	4	2			1			1	1	1	1				1	1	1	1
1	2	2	34	1		2	2	3	7	5		0	1	3	1	1	3	5	1	1	1	3	5	1	5	3	4	6	5	2	1											1							1
1	2	2	31	1		5	5	1	5	1		15	1	1	1	1	2	3	1	1	1	4	5	1	1	1	2	2	1	5				1	No reasons	1	1		1				1	1	1	1
1	2	2	25	2		6	6	2	6	1		50	1	2	1	1	4	5	2	2	5	5	3	1	4	4	5	5	3	4	1		1			1	1	1	1										1
1	2	2	42	1		6	6	2	5	1		29	2	2	1	1	2	4	2	1	4	3	4	1	4	1	2	2	2	3	1		1			1	1	1	1					1	1	1
1	2	2	26	1		5	5	1	4	1		25	2	5	1	1	4	5	3	3	5	3	3	1	3	1	3	2	3	4			1			1	1	1	1				1	1	1	1	1	1
1	2	2	21	2		5	5	2	4	1		55	1	2	1	1	3	4	3	2	3	3	4	1	2	1	3	3	2	3			1			1	1	1	1				1	1	1	1
1	2	2	19	3	Genderfluid	5	5	3	3	1		50	2	3	1	1	3	4	2	2	3	3	4	1	4	3	3	3	3	3			1			1	1	1	1				1	1	1	1
1	2	2	37	1		4	2	4	7	1		30	1	2	1	1	3	4	1	1	4	4	5	1	4	1	2	2	2	2	1			1	environmental concerns	1	1	1	1				1	1	1	1	1	1
1	2	2	24	2		2	2	2	6	1		45	2	3	1	1	3	4	2	1	2	3	4	1	4	2	2	2	2	2	1					1	1	1	1				1	1	1	1
1	2	2	55	1		8	8	1	5	1		80	1	2	1	1	4	4	3	2	4	3	4	1	2	2	2	2	1	4				1	Additives	1	1	1	1				1	1	1	1
1	2	2	23	2		1	1	1	6	1		15	2	5	1	1	3	5	2	1	4	4	3	1	4	2	4	4	4	3			1			1	1	1	1							1
1	2	2	21	2		4	4	1	4	5		0	2	5	1	1	3	3	1	1	1	3	4	1	4	3	3	3	3	3	1											1		1	1	1
1	2	2	21	2		3	3	1	6	1		35	1	2	1	1	2	4	2	2	4	4	4	1	4	2	3	3	2	3			1			1	1	1	1					1	1	1
1	2	2	20	2		5	5	1	4	1		50	2	5	1	1	3	4	2	2	4	4	4	1	5	1	3	3	2	3			1			1	1	1	1						1	1
1	2	2	25	1		2	1	2	6	1		50	1	1	1	1	3	5	1	1	3	4	2	1	4	1	3	2	1	4			1			1	1	1	1				1	1	1	1	1	1
1	2	2	45	1		6	8	5	6	1		40	1	2	1	1	3	5	2	4	4	4	5	1	4	2	2	3	2	3	1		1			1	1	1	1					1		1
1	2	2	44	2		5	4	2	5	1		38	2	5	1	1	3	5	3	1	4	4	4	1	4	1	2	2	3	3			1			1	1	1	1					1
1	2	2	25	2		1	1	5	6	1			2	3	1	1	4	5	2	2	5	4	4	1	4	2	3	3	1	4			1			1	1		1				1	1		1
1	2	2	41	2		2	2	2	6	1		30	2	2	1	1	3	3	2	2	3	3	4	1	2	1	2	2	2	2	1			1	resource concerns	1	1	1	1				1	1	1	1
1	2	2	24	2		1	1	5	6	1		10	2	5	1	1	3	3	1	1	2	3	5	1	4	1	1	1	2	2			1			1	1	1	1				1	1	1	1	1
1	2	2	42	2		3	3	1	6	4		0	3	3	1	1	3	4	1	1	1	3	5	1	2	5								1	I don't eat meat							1							1
1	2	2	28	2		7	1	3	5	2		20	2	5	1	1	5	5	2	2	5	5	5	1	2	5							1			1	1												1
1	2	2	28	2		5	5	3	6	1		31	3	4	1	1	4	5	1	3	4	3	4	1	2	3	3	3	3	5	1					1	1	1	1				1
1	2	2	26	2		9	8	4	6	1		64	2	5	1	1	5	5	3	2	5	5	1	1	5	5							1			1	1	1	1										1
1	2	2	34	1		4	4	2	6	1		41	1	2	1	1	2	2	2	2	2	3	3	1	4	2	2	2	2	3						1	1	1	1				1	1	1	1
1	2	2	36	2		5	5	2	7	1		18	3	2	1	1	3	5	1	2	4	3	4	1	2	2	4	3	3	3			1			1	1	1	1							1
1	2	2	23	2		1	1	1	4	1		63	1	1	1	1	4	4	1		3	4	3	1	1	1	2	2	1	3			1			1	1	1	1				1	1	1	1
1	2	2	38	2		5	5	2	6	1		61	2	5	1	1	2	5	1	3	4	4	5	1	5	2	3	3	3	4			1			1	1	1	1					1	1	1
1	2	2	24	2		5	5	6	4	1		90	1	3	1	1	4	5	2	3	2	3	5	1	4	2	3	2	2	3			1				1	1	1					1	1	1
1	2	2	50	2		5	6	4	4	1		30	2	4	1	1	4	4	2	1	4	4	5	1	2	1	2	2	2	2	1					1	1	1	1				1	1	1	1
1	2	2	31	2		7	7	4	6	1		33	2	3	1	1	3	4	4	2	4	3	2	1	4	2	3	3	4	3			1			1	1	1	1				1	1
1	2	2	19	2		5	5	5	6	1		59	2	4	1	1	3	4	2	3	2	3	2	1	4	2	2	3	3	3			1				1	1	1					1	1	1
1	2	2	28	1		5	4	1	5	1		2	1	1	1	1	3	4	2	3	4	3	4	1	3	2	3	3	4	3	1		1			1	1	1	1				1	1	1	1
1	2	2	43	1		7	7	4	4	1		25	1	3	1	1	4	5	3	3	4	5	4	1	4	2	3	4	1	5			1	1	nutrition	1	1	1	1							1
1	2	2	19	1		5	4	1	4	1		40	2	5	1	1	4	5	2	3	5	4	5	1	1	4	5	5	4	4			1	1	It is man-made & not a lot of research has been done on its effects. Generally seen as a negative.	1	1	1	1										1
1	2	2	19	1		2	3	1	4	1		30	2	5	1	1	2	4	1	1	4	4	3	1	4	1	2	2	1	3			1			1	1	1	1				1	1	1	1
1	2	2	34	2		2	4	3	4	4		0	1	3	1	1	3	5	4	2	2	4	4	1	5	2	5	6	4	5		1										1							1
1	2	2	41	1		2	2	6	6	1		75	2	5	1	1	4	5	2	2	5	5	5	1	2	2	3	4	3	4	1		1			1	1	1	1					1	1	1
1	2	2	28	1		4	4	3	6	1		59	2	5	1	1	2	4	2	1	4	5	5	1	1	2	3	2	1	4						1	1	1	1				1	1	1	1
1	2	2	54	2		2	2	3	6	2		30	2	3	1	1	3	4	2	2	4	3	4	1	4	2	2	2	2	3			1			1	1	1						1
1	2	2	58	1		3	3	4	7	1		33	3	4	1	1	3	5	2	2	4	4	4	1	2	2	3	3	2	3			1			1	1	1	1				1	1	1	1
1	2	2	37	1		5	6	3	5	2		50	3	4	1	1	3	4	2	2	4	4	4	1	2	1	2	2	2	3			1			1			1				1			1
1	2	2	21	1		1	1	3	4	1		60	2	5	1	1	3	3	1	1	3	3	5	1	4	1	1	1	1	3			1			1	1	1	1				1	1	1	1
1	2	2	42	2		5	5	4	7	1		35	2	4	1	1	4	5	5	5	5	5	3	1	5	5								1	the idea is repulsive	1	1	1	1										1
1	2	2	47	1		2	2	2	5	1		70	2	5	1	1	2	5	2	4	5	5	5	1	4	4	5	5	2	4	1		1				1	1	1					1		1
1	2	2	23	1		3	2	4	6	1		40	1	2	1	1	3	5	1	1	2	4	5	1	5	1	1	1	1	2						1	1	1	1				1	1	1	1
1	2	2	23	1		3	3	2	6	1		34	2	3	1	1	1	3	1	1	3	3	5	1	4	1	2	1	1	3				1	environmental concerns	1	1	1	1				1	1	1	1
1	2	2	37	1		2	2	4	6	1		61	1	2	1	1	3	4	2	3	3	3	4	1	2	1	3	3	3	3	1		1			1	1	1	1				1	1	1	1
1	2	2	42	2		7	8	4	6	1		20	2	5	1	1	5	5	2	4	5	5	4	1	1	3	3	4	3	5			1			1	1	1	1										1
1	2	2	59	2		1	1	2	7	1		30	1	2	1	1	3	3	2	2	4	3	4	1	5	1	2	2	2	2			1			1	1	1	1				1	1	1	1
1	2	2	30	1		5	5	3	5	1		30	1	2	1	1	2	5	1	1	2	4	4	1	1	1	2	3	1	3			1			1	1	1	1				1	1	1	1
1	2	2	35	2		3	3	4	6	1		40	2	5	1	1	3	4	1	1	2	4	5	1	5	1	2	2	1	2			1			1	1	1	1				1	1	1	1
1	2	2	29	1		4	4	5	6	1		40	2	5	1	1	3	3	2	1	3	3	5	1	4	1	2	1	2	3			1				1	1	1					1	1	1
1	2	2	24	1		3	3	1	6	1		35	2	3	1	1	3	5	1	1	4	4	5	1	4	1	2	3	2	3			1			1	1	1	1						1	1
1	2	2	29	1		4	4	1	4	1		50	1	1	1	1	1	3	1	1	1	3	5	1	5	1	1	1	1	2			1	1	if it costs too much	1	1	1	1				1	1	1	1
1	2	2	31	2		3	4	6	6	1		28	2	5	1	1	4	5	3	5	5	5	5	1	1	4	4	4	5	5	1		1			1	1	1	1										1
1	2	2	40	2		6	6	2	6	1		48	2	3	1	1	4	5	4	4	4	4	1	1	4	4	4	5	4	4			1	1	unnatural	1	1		1										1
1	2	2	28	1		6	7	4	4	1		33	2	4	1	1	5	5	1	3	5	4	5	1	2	4	4	4	1	4	1		1	1	Need studies on the body	1	1	1	1				1	1	1	1
1	2	2	33	1		5	5	1	4	1		31	1	1	1	1	2	3	1	1	1	3	5	1	4	1	2	2	1	2			1				1	1	1					1	1	1
1	2	2	26	2		2	2	2	6	1		30	3	3	1	1	5	5	2	2	5	4	2	1	1	5							1			1	1	1	1										1
1	2	2	56	2		4	4	6	5	1		35	1	2	1	1	4	5	2	5	5	4	3	1	4	5					1		1	1	seems unnatural, fake meat	1	1	1	1										1
1	2	2	43	1		2	2	2	5	1		65	2	5	1	1	3	4	2	3	3	3	4	1	4	3	3	3	3	4			1			1	1	1	1				1	1	1	1
1	2	2	39	1		5	7	4	4	1		31	2	3	1	1	3	4	2	5	5	3	3	1	2	2	3	4	2	5			1			1	1	1	1							1
1	2	2	45	1		4	4	2	6	1		30	2	3	1	1	4	4	2	3	4	4	5	1	2	2	2	3	2	4			1			1	1	1	1				1	1	1	1
1	2	2	21	2		1	1	1	6	1		30	2	3	1	1	3	3	2	2	5	4	4	1	2	3	4	4	4	4			1				1	1	1							1
1	2	2	52	1		6	6	1	6	1		31	1	1	1	1	2	5	1	2	2	4	4	1	5	1	2	2	2	2			1			1	1	1	1				1	1	1	1
1	2
1	2	2
1	2	2
1
1	2	2
1	2	2	30	1		9	6	2	6	2		79	2	5
1	2	2	24	2		1	1	4	6	2		30	1	2	1	1	1	1	1	1	2	2	5	1	1	1	1	1	1	2						1	1	1	1				1	1		1
1	2	2	24	1		4	4	1	6	1		42	2	2	1	1	3	5	1	2	4	3	3	1	3	2	4	4	4	4				1	Curiosity	1	1	1	1				1	1		1
1	2	2	25	2		3	2	1	6	1		20	2	5	1	1	2	5	1	1	5	4	5	1	2	2	4	3	2	3			1			1	1	1	1				1	1	1	1
1	2	2	27	2		1	1	3	4	1		20	2	5	1	1	3	5	2	1	4	4	5	1	3	2	3	3	2	3			1				1	1	1					1	1	1
1	2	2	25	2		2	2	2	4	1		60	2	5	1	1	2	5	1	1	4	4	5	1	4	1	3	4	1	2			1			1	1	1	1							1
1	2	2	26	2		5	7	3	7	1		21	1	2	1	1	5	4	1	2	5	5	1	1	5	4	5	5	5	5				1	Danger of it being unhealthy; its not natural	1	1	1	1										1
1	2	2	21	1		5	5	6	6	1		66	3	4	1	1	2	4	1	1	4	4	4	1	5	1	2	3	3	3			1			1	1	1	1				1	1	1	1
1	2	2	25	1		2	2	1	6	1		52	1	2	1	1	2	5	1	2	3	4	5	1	4	1	2	3	2	3	1					1	1	1	1				1	1	1	1
1	2	2	25	2		6	3	2	6	1		100	2	4	1	1	2	5	4	1	3	4	5	1	5	2	3	4	2	3			1			1	1	1	1					1	1	1
1	2	2	19	2		3	3	1	4	1		70	1	1	1	1	3	4	3	2	5	4	4	1	2	1	3	3	3	3			1			1	1	1	1				1	1	1	1
1	2	2	36	1		6	6	1	3	1		20	1	2	1	1	3	4	2	2	4	3	4	1	4	2	2	2	2	4			1	1	possible long term health risks	1	1	1	1				1	1	1	1
1	2	2	30	1		5	5	1	4	1		40	2	5	1	1	2	5	4	3	4	4	4	1	4	2	4	4	4	2			1			1	1	1	1				1	1	1	1
1	2	2	28	1		2	2	2	6	5		0	1	1	1	1	3	3	1	1	1	3	4	1	1	4	4	6	5	3				1	I don't eat animal flesh/less healthy							1							1
1	2	2	22	2		4	4	2	5	1		30	1	2	1	1	3	4	2	2	4	4	4	1	2	2	3	3	2	4			1			1	1	1	1					1	1	1
1	2	2	49	2		3	3	1	6	1		16	2	3	1	1	3	5	2	2	5	4	5	1	4	4	5	4	5	3			1	1	Too unusual.	1	1	1	1										1
1	2	2	24	2		6	6	4	6	1		25	1	2	1	1	4	5	3	3	5	5	4	1	1	3	4	4	2	5			1	1	it just doesn't seem natural		1	1	1					1	1	1
1	2	2	26	1		6	6	2	6	1		30	1	2	1	1	3	4	1	1	3	3	5	1	4	1	1	1	1	4	1					1	1	1	1				1	1	1	1
1	2	2	33	1		6	6	4	6	1		50	3	3	1	1	3	5	3	3	4	4	5	1	5	2	3	3	1	3			1				1	1	1					1	1	1
1	2	2	31	2		4	4	4	4	1		50	2	3	1	1	3	4	3	3	4	4	4	1	4	2	4	4	3	3			1			1	1	1	1										1
1	2	2	21	2		7	7	2	4	1		50	1	1	1	1	3	3	2	1	3	3	5	1	3	1	2	3	3	4			1			1	1	1	1				1	1	1	1
1	2	2	37	2		5	5	3	6	2		50	2	5	1	1	2	5	2	2	3	3	3	1	4	2	2	2	4	2	1		1				1	1						1	1
1	2	2	52	1		7	7	5	4	1		40	2	4	1	1	3	4	2	3	4	3	4	1	2	2	3	4	2	4			1				1	1	1					1	1	1
1	2	2	22	2		1	1	2	7	2		15	2	4	1	1	3	4	2	2	2	3	5	1	4	1	3	2	3	2			1			1	1	1					1	1	1	1
1	2	2	27	2		5	5	2	6	1		88	1	1	1	1	3	5	3	3	5	4	2	1	5	4	5	5	3	3			1			1	1	1	1							1
1	2	2	31	1		5	3	4	6	2		31	2	3	1	1	4	5	3	4	4	5	4	1	5	4	4	4	4	3	1					1	1												1
1	2	2	62	2		1	1	1	4	1		40	2	5	1	1	2	4	1	1	4	3	5	1	1	1	3	2	2	4			1			1	1	1	1				1	1	1	1
1	2	2	70	1		5	4	4	6	1		40	2	5	1	1	3	5	1	3	4	3	4	1	4	2	3	4	2	2			1			1	1		1				1	1		1
1	2	2	39	2		3	3	3	6	1		25	2	2	1	1	3	5	2	1	2	4	4	1	4	2	3	2	2	2			1			1	1	1	1					1	1	1
1	2	2	31	1		3	3	5	6	1		40	3	2	1	1	3	4	1	1	2	3	4	1	2	1	3	3	2	3			1			1	1	1	1				1	1	1	1	1
1	2	2	24	2		2	2	1	6	1		50	2	4	1	1	2	5	1	1	4	4	5	1	2	2	4	4	2	3			1			1	1	1	1				1	1	1	1
1	2	2	33	1		2	1	2	5	4		0	1	1	1	1	3	4	1	1	3	3	5	1	1	2	4	3	4	3			1									1		1	1	1
1	2	2	33	2		6	3	2	5	1		20	2	3	1	1	4	5	4	1	5	4	5	1	5	2	4	5	3	4			1			1	1	1	1							1
1	2	2	28	1		6	6	2	4	1		10	2	5	1	1	2	4	3	2	4	5	5	1	4	2	3	4	4	3			1			1	1	1	1							1
1	2	2	25	2		1	1	2	4	1		50	2	4	1	1	4	4	1	1	4	4	4	1	4	2	3	3	2	3	1					1	1	1								1
1	2	2	31	2		2	2	5	6	1		60	2	3	1	1	4	5	5	2	5	4	4	1	2	2	4	4	4	5			1	1	Chemicals	1	1	1	1					1	1	1
1	2	2	18	1		7	7	3	6	1		60	3	3	1	1	3	5	1	2	4	4	4	1	2	3	4	4	2	5			1			1	1	1	1				1	1	1	1
1	2	2	30	2		1	1	2	6	1		15	2	3	1	1	3	4	2	1	3	3	4	1	2	3	3	2	5	4			1				1	1	1					1	1	1
1	2	2	21	3	transgender	1	1	1	4	1		20	1	1	1	1	3	3	2	2	3	3	5	1	4	1	1	1	1	3				1	If I was unable to eat it because of the composition and my health issues			1	1						1	1
1	2	2	25	1		7	9	1	4	1		25	2	5	1	1	3	4	1	1	4	4	5	1	2	1	3	3	1	3			1			1	1		1				1	1		1
1	2	2	51	1		5	5	6	7	1		33	2	5	1	1	2	5	1	1	5	5	5	1	1	2	3	3	3	4				1	The idea is gross	1	1	1	1							1
1	2	2	25	1		1	1	1	5	1		55	2	4	1	1	2	4	1	1	2	4	5	1	1	1	2	2	1	2				1	No Reason Not To	1	1	1	1				1	1	1	1
1	2	2	28	1		8	8	2		1		32	2	4	1	1	1	5	1	1	5	5	1	1	2	1	4	5	2	3			1			1		1	1				1		1			1
1	2	2	20	1		1	1	2	4	1		50	2	3	1	1	3	5	2	3	5	4	4	1	1	2	3	3	2	4			1			1	1	1	1				1	1	1	1
1	2	2	24	2		8	7	4	6	1		70	2	5	1	1	3	5	2	1	5	5	3	1	4	4	5	5	5	4			1			1	1	1	1										1
1	2	2	28	1		6	6	5	6	1		20	1	2	1	1	3	4	2	2	4	4	5	1	4	2	4	4	2	4			1			1	1	1	1						1	1
1	2	2	43	1		2	2	6	7	1		10	2	3	1	1	4	5	2	4	4	4	4	1	2	3	4	4	3	4	1	1	1			1		1	1							1
1	2	2	56	2		2	2	3	6	1		30	2	5	1	1	2	5	1	1	1	4	5	1	5	2	2	2	3	2			1	1	questions concerning health benefits of in vitro meat over farmed meat	1	1	1	1				1	1	1	1
1	2	2	19	1		4	4	3	4	1		30	2	5	1	1	4	5	2	1	5	4	3	1	4	2	4	4	2	3			1			1	1	1	1					1	1	1
1	2	2	31	1		3	4	2	6	1		35	1	1	1	1	3	3	1	1	4	4	5	1	3	2	2	2	2	3	1	1	1	1	Environmentalism	1	1	1	1				1	1	1	1
1	2	2	37	2		6	6	2	6	1		50	2	4	1	1	2	5	2	3	5	4	4	1	5	4	4	5	4	5			1			1	1	1	1										1
1	2	2	36	1		4	4	6	6	1		36	2	2	1	1	3	5	2	2	4	5	4	1	2	2	2	3	4	4			1			1	1	1	1				1	1
1	2	2	25	2		3	3	3	7	1		21	2	5	1	1	5	5	2	2	5	5	2	1	5	2	3	4	3	3			1			1	1	1	1					1	1	1
1	2	2	45	1		3	4	3	4	1		31	2	5	1	1	4	5	2	2	5	3	3	1	1	4	4	4	2	5			1	1	Not sure about chemicals used to grow in vitro meat	1	1	1	1						1	1
1	2	2	20	2		1	1	2	4	1		21	2	3	1	1	2	4	1	2	3	4	5	1	4	1	2	2	2	3	1					1	1	1	1				1	1	1	1
1	2	2	51	2		2	2	6	7	1		20	2	3	1	1	3	4	2	3	4	5	4	1	5	2	3	3	4	3	1					1	1						1	1
1	2	2	35	2		3	3	6	6	1		30	2	5	1	1	3	5	1	1	2	3	5	1	2	1	2	2	3	4			1			1	1		1					1		1
1	2	2	21	1		4	4	2	4	1		60	1	2	1	1	3	5	1	1	4	4	3	1	2	3	3	3	2	4	1					1	1	1	1					1	1	1
1	2	2	30	2		2	2	3	7	1		25	2	4	1	1	4	4	2	2	4	4	4	1	2	2	2	2	2	4	1		1	1	limited research on nutritional content and health impact	1	1	1	1				1	1	1	1
1	2	2	26	1		4	4	1	6	1		10	2	5	1	1	3	5	2	1	2	5	3	1	5	1	3	2	3	3			1			1	1		1				1	1	1	1
1	2	2	22	2		5	4	1	4	1		79	2	4	1	1	3	4	1	2	3	3	5	1	1	2	3	2	3	2			1			1	1	1	1				1	1	1	1
1	2	2	23	1		5	5	2	6	1		50	2	5	1	1	3	4	1	2	5	4	4	1	5	2	3	4	2	3			1			1	1	1	1					1	1	1
1	2	2	45	2		5	6	2	6	1		26	2	3	1	1	1	4	2	2	2	2	5	1	4	2	2	2	2	4			1			1	1	1	1						1	1
1	2	2	25	1		1	1	2	4	1		44	1	2	1	1	4	5	2	3	5	3	3	1	4	5					1		1	1	the idea creeps me out	1	1	1											1
1	2	2	29	2		3	4	3	7	1		29	2	2	1	1	4	5	3	2	4	5	3	1	2	3	3	3	3	5	1		1	1	health effects on humans	1	1	1	1										1
1	2	2	28	1		5	5	6	7	1		46	1	1	1	1	3	3	2	2	3	3	3	1	4	1	1	1	1	3			1			1	1	1	1				1	1	1	1	1	1
1	2	2	23	1		6	4	2	4	1		60	2	5	1	1	3	4	2	1	4	5	3	1	4	1	3	3	1	3			1			1	1	1	1				1	1		1
1	2	2	28	1		6	6	6	6	1		25	2	5	1	1	3	5	1	3	4	4	4	1	5	1	3	4	2	3			1			1	1	1	1				1	1	1	1
1	2	2	31	1		5	5	6	4	1		35	2	4	1	1	2	4	1	2	2	3	5	1	2	2	2	2	2	3			1				1	1	1					1	1	1
1	2	2	22	1		2	2	1	6	1		50	2	4	1	1	2	4	2	2	4	4	4	1	4	2	4	5	2	4			1			1	1	1	1				1	1	1	1
1	2	2	42	1		4	4	1	4	1		75	2	5	1	1	4	5	1	2	5	4	4	1	2	2	3	4	3	4			1			1	1	1	1				1	1	1	1
1	2	2	22	2		2	2	1	4	1		40	2	3	1	1	3	4	1	2	4	4	1	1	2	2	4	3	2	3			1			1	1	1						1	1	1	1
1	2	2	21	1		3	3	1	4	1		20	2	4	1	1	3	5	1	1	3	3	4	1	5	1	2	2	1	3	1		1				1	1	1					1	1	1
1	2	2	42	1		2	2	4	4	1		66	3	3	1	1	3	3	2	1	4	4	3	1	4	2	3	3	4	3	1		1			1	1	1	1										1
1	2	2	23	2		3	2	3	6	1		51	2	5	1	1	2	5	1	1	2	4	4	1	3	2	2	2	2	2			1				1	1	1					1	1	1
1	2	2	19	1		5	5	2	5	1		91	2	5	1	1	3	5	1	2	3	4	5	1	4	1	3	3	3	3			1				1	1						1
1	2	2	24	2		2	2	2	6	1		25	3	3	1	1	4	5	2	3	5	4	2	1	2	4	5	4	4	4			1	1	Unsure of chemical used	1	1	1	1							1
1	2	2	25	2		3	2	1	6	4		0	1	1	1	1	2	4	1	1	4	3	5	1	4	3	5	6	5	2			1	1	just don't care if meat is in my diet							1		1
1	2	2	21	2		4	3	1	6	4		0	2	3	1	1	2	4	2	1	1	4	5	1	4	1	1	1	2	2			1									1		1	1	1
1	2	2	29	2		5	4	2	7	1		40	1	2	1	1	3	4	1	1	2	4	4	1	2	1	1	3	1	3	1		1			1	1	1	1				1	1	1	1
1	2	2	24	1		5	6	1	6	1		50	2	4	1	1	3	5	1	1	5	4	3	1	2	2	3	4	3	4			1			1	1	1	1						1	1
1	2	2	31	1		8	8	4	6	1		20	1	2	1	1	2	4	1	1	2	3	5	1	1	1	1	1	1	3	1		1			1	1	1	1				1	1	1	1
1	2	2	29	1		3	4	1	6	1		66	2	2	1	1	2	4	2	4	4	4	3	1	2	2	3	2	1	4			1			1	1	1	1						1	1
1	2	2	25	1		3	5	1	6	1		51	1	2	1	1	2	2	4	3	2	3	4	1	2	4	4	4	4	4			1						1						1
1	2	2	25	2		3	3	5	4	1		60	1	1	1	1	3	5	2	1	4	3	5	1	4	3	3	4	2	3			1			1	1	1	1						1	1
1	2	2	55	1		6	6	3	6	1		75	2	3	1	1	5	4	3	4	5	4	4	1	4	4	4	4	3	3				1	concern over artificial chems used to produce it	1	1	1	1										1
1	2	2	24	1		2	2	2	6	1		15	1	1	1	1	2	5	1	1	4	3	4	1	2	1	2	2	2	4	1			1	cost	1	1	1	1						1	1
1	2	2	59	2		5	5	3	4	1		45	2	5	1	1	5	5	2	2	5	5	3	1	1	2	3	3	3	5			1	1	I think natural is the best	1	1	1	1										1
1	2	2	21	1		3	3	2	4	1		55	1	3	1	1	3	3	2	1	1	3	4	1	2	1	2	2	1	2						1	1	1	1				1	1	1	1
1	2	2	29	1		3	3	2	6	1		35	2	3	1	1	4	4	3	1	4	3	3	1	4	1	2	2	1	3			1			1	1	1	1				1	1	1	1	1	1
1	2	2	26	1		5	5	1	4	1		90	1	4	1	1	1	2	1	1	2	2	4	1	1	2	2	2	1	2			1			1	1	1	1				1	1	1	1
1	2	2	24	2		2	2	1	4	1		50	2	4	1	1	3	3	2	3	4	4	4	1	4	2	5	5	4	3			1			1	1	1	1							1
1	2	2	42	2		6	6	6	6	1		20	2	3	1	1	5	5	4	1	5	3	3	1	4	4	5	5	3	5			1	1	Don't trust the science not to hurt my health	1	1	1	1										1
1	2	2	37	2		5	4	1	4	1		31	2	5	1	1	3	4	2	4	5	4	5	1	5	2	2	2	2	4			1			1							1
1	2	2	47	2		4	4	1	4	1		30	2	5	1	1	4	5	2	3	5	5	5	1	5	4	5	5	1	5			1			1	1	1	1				1	1	1	1
1	2	2	24	2		2	2	1	6	1		49	2	5	1	1	3	3	3	3	3	5	2	1	5	4	5	5	5	5			1			1	1	1	1										1
1	2	2	33	2		3	3	5	7	1		31	2	2	1	1	4	5	2	2	4	4	3	1	4	4	5	4	4	4			1				1	1	1										1
1	2	2	36	1		5	3	4	4	5		0	3	3	1	1	2	2	1	2	2	3	3	1	3	4	4	6	5	3	1											1							1
1	2	2	23	1		7	7	3	6	1		65	2	3	1	1	3	4	1	3	4	3	5	1	2	1	3	4	2	4			1			1	1	1	1				1	1	1	1
1	2	2	35	1		1	1	2	6	1		40	1	1	1	1	3	5	1	1	4	4	5	1	2	1	2	2	2	4			1			1	1	1	1				1	1	1	1
1	2	2	21	1		2	3	1	4	1		40	1	1	1	1	3	4	2	1	3	3	5	1	4	1	2	3	2	3			1			1	1	1	1					1	1	1
1	2	2	30	2		5	5	3	6	4		1	1	2	1	1	3	5	1	1	3	3	5	1	2	3	5	2	4	3	1		1			1							1	1
1	2	2	37	1		3	3	5	6	1		30	1	2	1	1	4	3	2	2	3	4	4	1	5	2	2	3	3	3			1			1	1	1	1				1	1	1	1	1	1
1	2	2	35	2		6	6	2	4	1		30	1	1	1	1	5	5	2	3	5	5	2	1	2	3	5	5	3	5			1	1	synthetic means of creating it	1	1	1	1										1
1	2	2	27	2		2	2	2	7	1		71	2	4	1	1	3	4	2	2	5	5	3	1	2	3	3	4	2	4			1			1	1		1					1
1	2	2	24	1		5	5	4	6	1		54	2	4	1	1	2	4	2	2	3	2	4	1	2	1	2	2	1	4			1			1	1	1	1				1	1	1	1
1	2	2	23	2		3	3	1	4	1		33	3	2	1	1	3	4	2	2	4	4	3	1	4	2	2	2	4	3			1				1	1	1					1	1	1
1	2	2	32	2		2	2	1	5	1		70	2	5	1	1	5	5	1	5	5	4		1	4	5					1					1	1	1	1										1
1	2	2	28	2		1	1	3	6	1		40	2	5	1	1	3	5	2	1	5	5	5	1	5	3	4	4	2	3			1			1	1	1	1					1		1
1	2	2	28	2		4	3	1	4	1		44	1	3	1	1	3	4	3	4	5	4	4	1	4	3	5	5	3	4			1			1	1	1	1										1
1	2	2	28	2		4	3	4	7	1		10	1	2	1	1	4	5	2	3	5	3	4	1	4	4	5	4	5	2	1			1	Disturbing, and may be unhealthy		1	1	1							1
1	2	2	29	1		5	5	3	6	5		0	1	1	1	1	2	4	2	1	3	4	4	1	4	4	4	6	4	2	1											1	1	1	1	1
1	2	2	31	2		4	3	1	6	1		38	2	5	1	1	3	4	2	2	2	4	5	1	4	1	2	3	1	3			1			1	1	1	1				1	1	1	1
1	2	2	42	1		9	9	3	6	1		40	2	5	1	1	3	5	3	5	5	4	5	1	4	5					1	1	1			1	1	1	1										1
1	2	2	35	2		7	8	3	6	1		40	2	4	1	1	3	5	2	3	5	5	4	1	5	4	4	4	5	4	1		1			1	1	1	1										1
1	2	2	35	2		5	5	2	6	1		25	2	5	1	1	5	5	3	3	5	5	4	1	5	4	5	4	5	3			1			1	1	1	1										1
1	2	2	50	2		5	5	3	4	1		50	2	5	1	1	4	5	2	4	5	5	3	1	2	5							1	1	it's unnatural		1	1	1										1
1	2	2	30	2		7	6	6	6	1		55	1	2	1	1	2	2	1	1	2	3	4	1	2	1	2	2	1	3	1		1			1	1	1	1						1	1
1	2	2	50	2		5	7	2	6	1		81	3	4	1	1	1	4	2	2	5	4	5	1	2	4	4	4	4	2			1			1	1	1	1				1	1
1	2	2	26	1		5	5	3	7	1		40	2	4	1	1	1	5	4	1	3	4	4	1	4	2	3	3	2	3	1		1				1	1	1					1	1	1
1	2	2	50	1		9	9	3	6	1		40	2	5	1	1	4	5	4	3	5	3	1	1	5	5							1			1		1	1										1
1	2	2	19	1		2	2	3	4	1		60	1	2	1	1	4	4	2	2	4	5	3	1	4	4	5	5	1	4	1					1	1	1	1										1
1	2	2	23	2		5	5	3	6	1		20	2	4	1	1	3	5	1	2	4	2	5	1	3	1	2	2	3	3	1					1	1	1	1				1	1	1	1
1	2	2	28	1		5	4	2	6	1		40	2	5	1	1	3	4	3	2	5	4	5	1	5	1	3	5	1	4			1				1	1	1					1	1	1
1	2	2	61	2		1	1	6	7	1		15	1	2	1	1	1	4	1	1	5	4	5	1	1	1	3	3	4	3			1			1	1	1	1				1	1	1	1
1	2	2	38	1		5	5	6	7	1		33	1	4	1	1	2	5	2	3	5	5	4	1	4	4	5	5	3	4			1			1	1	1	1							1
1	2	2	21	2		2	2	2	6	1		40	1	1	1	1	2	5	1	1	2	4	5	1	1	1	2	3	1	2			1				1	1	1				1	1	1	1
1	2	2	24	1		2	2	1	4	1		30	1	2	1	1	3	4	2	2	4	4	4	1	2	2	3	3	2	4			1			1	1	1	1							1
1	2	2	31	2		6	3	2	6	1		30	1	2	1	1	3	5	1	1	4	3	5	1	4	1	1	1	1	2			1			1	1	1	1				1	1	1	1	1
1	2	2	34	1		5	3	2	4	1		40	3	3	1	1	2	4	1	1	2	2	5	1	4	1	2	2	1	2			1			1	1	1	1					1	1	1
1	2	2	23	1		7	6	1	4	1		52	2	2	1	1	5	5	3	3	5	5	4	1	2	4	4	5	2	4	1		1			1	1	1	1							1
1	2	2	23	2		2	2	3	4	1		54	2	3	1	1	2	4	1	3	3	3	3	1	4	2	2	2	3	3			1			1	1	1	1				1	1	1	1
1	2	2	30	2		2	2	4	6	1		30	2	3	1	1	3	4	1	2	3	3	4	1	4	2	2	2	1	3						1	1	1	1				1	1	1	1
1	2	2	47	1		2	2	2	4	1		30	2	3	1	1	3	5	1	1	2	3	5	1	1	1	1	1	1	3			1			1	1	1	1				1	1	1	1
1	2	2	36	2		7	2	2	5	1		67	2	1	1	1	4	4	2	4	5	4	2	1	4	4	4	4	4	1			1			1													1
1	2	2	60	2		3	2	4	4	1		38	2	5	1	1	3	3	1	1	4	3	5	1	1	2	2	2	1	2	1					1	1	1	1					1	1	1
1	2	2	29	2		6	7	2	6	1		75	1	1	1	1	2	4	2	4	4	4	5	1	4	3	4	4	4	4	1	1	1			1	1	1	1				1	1	1	1
1	2	2	25	2		2	2	3	7	2		15	2	4	1	1	4	4	4	3	5	3	4	1	5	3	4	6	5	2	1					1	1												1
1	2	2	46	2		2	2	4	6	5			2	2	1	1	3	3	2	2	3	3	4	1	4	4	4	4	5	3				1	This just seems very unappealing.							1							1
1	2	2	53	1		3	3	1	6	1		20	1	2	1	1	3	4	2	2	4	4	4	1	4	1	3	3	2	4			1			1	1	1	1				1	1	1	1
1	2	2	32	1		6	6	3	4	1		47	2	5	1	1	2	3	1	2	4	3	2	1	5	3	3	3	3	2			1			1	1	1	1				1	1	1	1
1	2	2	42	1		6	4	3	5	1		32	1	2	1	1	2	4	2	2	4	3	5	1	4	1	2	2	1	2			1			1	1	1	1					1	1	1	1
1	2	2	32	1		8	8	2	5	2		51	1	4	1	1	4	5	3	2	4	4	4	1	2	2	3	4	2	4			1				1	1					1	1	1
1	2	2	30	1		5	3	5	6	1		71	1	1	1	1	1	4		1	2	4	5	1	4	1	2	3	1	3			1			1	1	1	1							1
1	2	2	48	1		8	8	4	4	1		50	2	5	1	1	4	5	2	2	4	4	4	1	4	2	2	2	2	3			1			1	1	1	1				1	1	1	1
1	2	2	21	2		5	2	2	4	1		18	2	4	1	1	4	5	2	2	5	4	3	1	2	4	4	5	3	5			1			1	1	1	1							1
1	2	2
1	2	2
1
1	2	2	20	1		5	5	2	6	1		68	2	3	1	1	5	3	4	4	4	4	4	1	4	2	4	4	3	4	1						1		1							1
1	2	2	19	2		1	6	5	5	1		61	1	3	1	1	5	5	5	5	5	5	3	1	3	5							1				1	1	1										1
1	2	2	21	2		3	2	1	4	2		25	3	3	1	1	3	3	1	1	2	3	4	1	3	1	3	2	3	3	1		1			1	1								1
1	2	2	30	1		3	3	2	7	1		30	2	4	1	1	4	5	1	2	4	5	2	1	2	4	4	4	2	4			1			1	1		1										1
1	2	2	61	1		8	7	2	3	1		60	2	3	1	1	3	4	1	1	4	4	4	1	1	2	2	3	2	3			1			1	1	1	1							1
1	2	2	53	2		1	1	4	6	1		41	2	5	1	1	3	5	2	4	5	3	4	1	4	5					1		1				1		1										1
1	2	2	18	1		4	4	1	4	1		65	3	3	1	1	3	4	3	3	4	3	2	1	4	2	3	4	3	3			1				1	1	1						1	1
1	2	2	20	2		3	1	2	4	1		36	2	5	1	1	1	1	1	1	2	3	4	1	1	1	2	2	1	4			1			1	1		1					1	1	1
1	2	2	62	2		5	5	3	6	1		20	2	5	1	1	2	4	2	3	4	4	3	1	4	2	4	4	2	4			1			1	1	1	1				1	1	1
1	2	2	22	1		3	6	2	4	1		50	1	2	1	1	2	4	1	1	2	4	5	1	2	1	2	2	2	4			1			1	1	1	1				1	1	1	1
1	2	2	22	2		4	4	2	4	1		51	1	2	1	1	2	2	1	1	1	3	4	1	2	1	2	1	1	3						1	1	1	1				1	1	1	1
1	2	2	28	1		8	8	3	7	1		37	3	3	1	1	4	5	4	3	5	4	4	1	2	4	4	4	3	4			1			1	1	1	1					1	1	1
1	2	2	43	1		6	6	2	6	2		7	2	5	1	1	2	4	1	1	4	3	4	1	2	1	1	2	3	4			1			1	1						1		1	1
1	2	2	30	2		5	5	3	7	1		50	2	4	1	1	4	3	3	2	5	1	4	1	1	2	2	4	4	4	1	1	1			1	1	1	1							1
1	2	2	22	1		5	5	1	6	1		45	2	5	1	1	3	4	2	1	4	3	2	1	4	2	3	3	2	3			1				1	1	1					1	1	1
1	2	2	24	2		9	9	1	3	2		22	2	5	1	1	5	5	2	1	3	5	5	1	5	2	3	4	4	2	1		1				1		1					1		1
1	2	2	21	2		3	3	1	4	1		20	1	2	1	1	3	3	1	2	3	3	4	1	2	2	2	2	2	3			1				1	1	1					1	1	1
1	2	2	52	1		4	4	5	4	1		40	1	3	1	1	2	4	1	1	2	4	5	1	5	2	2	2	1	4			1			1	1		1				1	1		1
1	2	2	26	2		2	2	1	7	6	Eat chicken, eat some fish, and occasionally pork. Will not eat any other meat.	13	2	5	1	1	4	5	2	2	3	3	3	1	4	3	5	3	3	4	1		1	1	Health concerns	1	1	1							1
1	2	2	55	1		3	3	2	4	1		20	2	5	1	1	2	4	2	1	2	3	3	1	4	1	2	3	2	3	1					1	1	1	1				1	1	1	1
1	2	2	26	1		5	5	2	6	1		25	2	5	1	1	4	5	1	2	4	4	3	1	2	1	2	2	2	3	1		1				1	1	1					1	1	1
1	2	2	25	2		3	3	3	6	1		70	2	4	1	1	3	5	5	5	3	4	5	1	4	2	2	3	2	3			1			1	1	1	1				1	1	1	1
1	2	2	43	2		5	5	1	4	1		60	2	5	1	1	1	3	3	1	2	4	4	1	1	3	3	4	3	5			1			1	1	1	1										1
1	2	2	27	1		5	5	1	7	1		40	2	2	1	1	3	4	2	2	2	3	5	1	5	1	2	2	3	2			1			1	1	1	1				1	1	1	1
1	2	2	38	1		2	2	3	7	1		36	2	2	1	1	3	3	2	2	3	3	4	1	2	2	2	2	3	4			1			1	1		1					1		1
1	2	2	51	1		7	7	2	6	1		66	2	5	1	1	2	4	1	1	4	4	1	1	4	2	2	3	1	4			1			1	1	1	1				1	1	1	1
1	2	2	21	2		8	8	4	6	1		50	2	4	1	1	3	4	3	2	4	4	4	1	2	2	2	3	2	4			1				1	1	1							1
1	2	2	51	2		4	4	1	6	1		50	3	3	1	1	3	4	2	1	3	4	4	1	4	2	2	3	2	4				1	personal preference based on psychological appeal	1	1	1	1				1	1	1	1
1	2	2	21	1		5	5	3	6	1		67	2	5	1	1	4	2	2	2	3	4	3	1	3	5					1						1	1	1						1	1
1	2	2	23	2		3	2	3	4	5		0	2	3	1	1	2	3	1	2	3	3	4	1	4	2	3	2	3	2			1									1		1	1	1
1	2	2	23	2		6	9	4	5	1		10	1	1	1	1	4	5	4	3	4	4	4	1	2	2	4	5	3	5			1			1	1	1						1	1
1	2	2	59	1		9	9	3	6	1		80	2	3	1	1	3	4	2	2	4	3	4	1	2	3	4	3	2	4			1			1	1	1	1				1	1	1	1
1	2	2	31	2		7	8	6	6	1		46	2	2	1	1	5	5	2	3	5	5	2	1	5	5					1		1			1	1	1	1										1
1	2	2	37	2		5	5	1	4	1		55	2	3	1	1	3	2	2	2	3	4	4	1	5	2	3	4	3	2			1			1	1	1	1							1
1	2	2	63	2		6	6	4	7	4		81	1	1	1	1	3	3	3	4	4	4	3	1	2	4	4	4	5	3			1			1	1	1	1										1
1	2	2	26	1		4	4	1	4	1		38	3	3	1	1	1	3	1	1	2	3	4	1	3	2	2	1	2	3			1			1	1	1	1				1	1	1	1	1
1	2	2	23	2		6	8	3	4	1		15	3	4	1	1	3	5	2	2	5	5	3	1	5	1	5	5	3	5			1			1	1	1	1				1	1	1	1
1	2	2	20	1		3	3	6	4	1		60	2	3	1	1	4	4	1	2	4	4	3	1	4	3	4	4	4	3			1			1	1	1	1										1
1	2	2	20	2		2	1	1	4	1		60	2	5	1	1	2	3	1	1	4	3	4	1	4	1	3	4	1	3	1						1	1	1					1	1	1
1	2	2	26	1		6	6	2	6	6	Omnivorous	44	2	2	1	1	4	5	3	3	3	2	5	1	2	2	2	2	1	3	1		1			1	1	1	1				1	1	1	1
1	2	2	26	2		5	5	3	4	1		40	2	3	1	1	5	5	3	3	5	5	4	1	4	5								1	health concerns/chemicals, ingredients, risk concerns	1	1	1	1										1
1	2	2	29	2		7	6	2	6	1		15	2	5	1	1	5	5	2	3	5	5	5	1	4	4	5	5	2	4			1			1	1	1	1						1
1	2	2	23	2		1	1	2	4	1		30	2	5	1	1	2	4	1	2	4	3	3	1	2	1	3	3	1	4			1	1	Safety concerns	1	1	1	1				1	1	1	1
1	2	2	27	2		8	7	1	6	1		83	2	5	1	1	4	5	1	2	4	3	4	1	1	1	4	2	2	5	1					1	1	1	1				1	1	1	1
1	2	2	32	1		4	4	5	7	1		30	2	3	1	1	2	4	1	3	5	4	5	1	2	2	2	2	2	3			1			1	1	1	1					1	1	1
1	2	2	60	2		3	3	1	7	3		2	2	5	1	1	2	5	1	1	5	3	5	1	5	5								1	It's too much like real meat, and real meat lost its appeal for me a long time ago	1													1
1	2	2	21	1		3	3	1	4	1		70	2	5	1	1	3	5	2	3	3	3	4	1	3	1	3	3	3	3			1	1	Health reasons	1	1	1	1				1	1	1	1
1	2	2	38	2		5	4	6	6	1		34	3	3	1	1	2	3	1	1	1	3	4	1	4	1	2	1	1	1			1			1	1	1	1				1	1	1	1
1	2	2	56	2		2	2	1	6	1		40	1	2	1	1	2	3	2	1	3	3	4	1	1	1	2	1	1	2			1			1	1	1	1				1	1	1	1
1	2	2	33	1		4	4	4	6	1		35	2	3	1	1	4	5	1	2	5	4	4	1	4	2	2	4	4	5			1			1	1	1	1				1	1	1	1
1	2	2	45	1		7	7	5	6	1		35	1	2	1	1	4	4	3	3	5	5	2	1	2	5					1		1			1	1	1	1										1
1	2	2	48	2		2	2	1	6	1		35	2	5	1	1	3	5	2	3	4	3	4	1	4	1	2	2	2	3			1				1	1	1					1	1	1
1	2	2	20	1		4	2	1	4	1		50	1	1	1	1	2	4	1	1	3	3	5	1	1	1	2	2	1	1			1			1	1	1	1					1	1	1
1	2	2	25	2		4	4	3	6	2		30	2	4	1	1	3	5	1	2	5	4	4	1	2	2	3	3	3	4	1			1	Simply curious		1		1					1		1
1	2	2	39	1		5	4	6	6	1		10	2	4	1	1	4	5	1	2	5	4	4	1	3	2	4	5	5	5			1	1	Unknown health consequences	1	1		1										1
1	2	2	21	2		1	1	1	6	6	Gluten-free diet (wheat allergy)	37	1	2	1	1	5	5	2	3	4	3	5	1	2	2	5	5	1	4	1			1	I'd be interested in learning much more about food safey / process guidelines that must be followed for in vitro meat, before trying it	1	1	1	1				1			1
1	2	2	24	2		1	1	1	6	1		30	2	3	1	1	3	5	1	3	3	3	4	1	2	1	2	2	2	4				1	none	1	1	1	1				1	1	1	1
1	2	2	28	2		4	4	3	4	1		31	2	3	1	1	5	5	3	3	5	5	4	1	4	4	4	5	4	2			1				1	1	1										1
1	2	2	32	2		5	5	4	7	1		36	3	4	1	1	4	5	3	3	5	5	3	1	4	4	4	4	5	5			1			1	1	1	1										1
1	2	2	46	1		5	5	1	7	1		30	2	5	1	1	4	4	2	3	4	4	4	1	3	2	3	4	4	5			1			1	1	1	1				1	1	1	1
1	2	2	20	2		5	5	1	4	1		35	1	3	1	1	4	5	2	4	4	3	4	1	2	2	4	3	3	4	1		1			1	1	1	1				1	1	1	1
1	2	2	21	1		8	8	1	4	1		40	1	3	1	1	4	4	1	1	4	5	2	1	2	2	4	4	2	4	1		1			1	1	1	1				1	1	1	1
1	2	2	24	2		2	1	2	6	2		20	2	5	1	1	5	5	5	5	5	5	1	1	3	5					1			1	Manufactured meat is completely unhealthy for you. Meat should be obtained from organic animals that do not reside in feed lots, are not fed antibiotics, are not fed corn (due to GMOs) and so on.		1												1
1	2	2	26	2		2	2	1	7	1		40	2	4	1	1	3	4	2	2	3	4	3	1	4	2	3	3	2	3			1				1	1	1					1	1	1
1	2	2	57	1		5	5	1	6	1		20	2	5	1	1	4	5	2	4	5	4	2	1	4	4	4	4	4	5	1			1	unverified	1	1	1	1										1
1	2	2	38	1		8	8	1	5	1		75	3	3	1	1	4	5	2	4	4	4	4	1	4	2	4	5	2	3	1		1			1	1	1	1							1
1	2	2	33	2		9	9	2	6	1		30	2	5	1	1	5	5	4	4	5	4	4	1	2	4	5	5	2	5	1		1	1	unnatural process could create new health problems	1	1	1	1										1
1	2	2	34	2		5	2	3	5	1		30	1	1	1	1	2	4	1	1	4	3	5	1	2	1	2	1	2	3			1			1	1	1	1				1	1	1	1
1	2	2	47	2		1	2	3	5	1		60	2	5	1	1	4	4	2	4	5	3	3	1	2	4	4	4	3	4	1		1			1	1	1	1										1
1	2	2	56	1		2	2	4	6	1		50	2	4	1	1	3	5	1	1	4	2	5	1	2	2	3	4	2	4			1			1	1	1	1							1
1	2	2	44	1		2	8	3	5	1		50	2	2	1	1	3	5	1	3	4	4	5	1	5	1	3	3	2	3			1			1	1	1	1				1	1	1	1
1	2	2	31	2		5	2	2	7	4		1	2	3	1	1	2	4	1	3	3	4	1	1	4	3	2	3	2	3	1	1	1									1		1
1	2	2	43	2		1	1	1	3	1		50	1	1	1	1	1	4	1	1	3	2	4	1	1	1	2	2	1	4			1			1	1	1	1				1	1	1	1
1	2	2	32	2		3	2	6	6	1		20	2	4	1	1	3	3	2	2	3	3	4	1	4	2	3	3	2	3				1	It seems strange		1	1	1					1	1	1
1	2	2	29	2		5	3	2	5	1		35	2	2	1	1	3	5	4	2	5	4	4	1	4	3	4	3	4	4			1			1	1	1	1						1
1	2	2	52	1		4	4	2	6	1		10	1	2	1	1	3	5	2	2	2	3	4	1	2	1	3	3	3	2	1		1			1	1	1	1				1	1	1	1
1	2	2	29	1		5	5	4	6	2		21	1	2	1	1	4	5	3	5	4	4	4	1	2	2	3	4	2	4	1		1			1	1						1	1
1	2	2	40	2		5	5	6	7	1		30	2	5	1	1	4	5	2	2	5	5	5	1	2	5								1	Not enough safety information	1	1	1											1
1	2	2	28	1		6	6	5	6	1		35	1	1	1	1	3	3	2	2	2	3	4	1	5	1	2	2	2	3			1			1	1	1	1				1	1	1	1
1	2	2	41	2		2	2	5	6	1		30	1	1	1	1	2	3	1	1	1	3	5	1	4	1	1	1	1	2			1			1	1	1	1				1	1	1	1
1	2	2	36	1		6	6	3	7	1		35	2	5	1	1	2	3	2	3	3	2	3	1	4	1	2	2	3	2			1			1	1	1	1				1	1	1	1
1	2	2	22	1		5	4	1	4	1		19	2	2	1	1	3	5	1	2	2	3	4	1	1	1	1	1	2	3				1	Economic reasons	1	1	1	1				1	1	1	1
1	2	2	35	2		2	2	3	5	1		41	2	5	1	1	4	5	3	3	5	5	4	1	4	4	4	5	3	5			1			1	1	1	1							1
1	2	2	54	1		8	8	6	6	1		25	2	5	1	1	3	3	2	3	4	4	4	1	5	2	3	3	2	3			1			1	1		1							1
1	2	2	18	2		3	3	1	4	1		31	2	5	1	1	3	4	2	1	3	4	4	1	2	1	2	2	1	3			1			1	1	1	1				1	1	1	1	1
1	2	2	29	2		5	5	1	4	1		60	1	5	1	1	3	4	3	3	5	5	3	1	2	3	3	3	2	3			1				1	1	1					1	1	1
1	2	2	34	2		1	1	2	6	1		18	2	3	1	1	3	4	1	3	4	3	5	1	2	2	3	3	1	4			1			1	1	1	1							1
1	2	2	20	1		5	5	1	6	1		40	2	3	1	1	3	5	1	4	5	3	5	1	4	4	4	5	4	4	1					1	1	1	1							1
1	2	2	24	2		3	3	3	6	1		21	2	5	1	1	5	5	2	2	5	5	4	1	4	2	3	3	4	5			1			1	1												1
1	2	2	26	1		1	1	3	7	1		40	2	5	1	1	3	4	1	3	4	4	5	1	2	2	3	4	3	5			1			1	1	1	1					1	1	1
1	2	2	25	2		4	4	2	4	1		12	2	5	1	1	2	3	1	1	2	5	4	1	5	2	2	2	2	2	1		1					1							1
1	2	2	29	2		4	2	3	6	6	Paleo	45	2	3	1	1	4	5	3	3	5	4	4	1	2	3	5	5	2	3			1	1	Health concerns.	1	1	1	1						1	1
1	2	2	23	2		5	6	2	5	1		30	2	3	1	1	3	4	1	1	4	3	5	1	2	2	3	2	3	4			1			1	1	1	1				1	1	1	1
1	2	2	25	2		3	3	1	6	1		20	2	2	1	1	2	5	3	1	2	4	4	1	4	1	3	2	4	3				1	chemicals in the in vitro meat	1	1	1	1				1	1	1	1
1	2	2	30	1		4	4	6	7	1		45	2	5	1	1	3	5	2	3	4	4	5	1	5	1	3	3	2	3			1			1	1	1	1				1	1	1	1
1	2	2	28	1		5	5	1	4	1		40	2	5	1	1	3	4	1	4	4	4	5	1	4	2	3	4	4	3			1			1	1						1	1
1	2	2	27	1		3	3	2	4	1		60	1	1	1	1	3	5	1	1	5	4	5	1	5	1	3	3	1	4			1				1	1	1					1	1	1
1	2	2	35	1		4	6	1	7	1		75	2	2	1	1	3	5	2	3	4	4	3	1	2	1	2	2	2	4			1	1	FDA approval or not	1	1	1	1				1	1	1	1
1	2	2	23	1		5	5	2	6	1		50	2	5	1	1	3	5	3	2	4	4	5	1	5	2	3	3	2	3			1	1	Sounds a little weird	1	1		1				1	1		1
1	2	2	43	1		5	5	2	6	1		30	2	3	1	1	2	5	1	1	4	4	5	1	4	1	1	2	2	2			1			1	1	1	1				1	1	1	1	1	1
1	2	2	22	2		7	7	3	6	1		40	2	4	1	1	4	3	4	3	5	4	4	1	3	4	5	5	4	2			1			1	1	1	1										1
1	2	2	24	1		5	7	4	4	1		60	2	5	1	1	3	5	1	1	5	5	4	1	2	2	2	4	2	4			1			1	1	1	1					1	1	1
1	2	2	50	1		7	7	4	6	1		20	3	4	1	1	3	5	2	1	4	3	5	1	5	2	3	3	1	2			1			1	1	1	1				1	1	1	1
1	2	2	34	1		5	5	3	6	1		40	2	3	1	1	3	5	2	3	5	5	4	1	3	1	4	4	2	5			1			1	1	1	1				1	1	1	1
1	2	2	20	2		2	2	4	4	1		38	1	1	1	1	2	5	5	1	4	4	5	1	5	2	3	3	2	2	1						1	1	1					1	1	1
1	2	2	34	2		2	2	1	4	5		0	1	2	1	1	3	3	2	2	3	3	4	1	3	5					1											1							1
1	2	2	30	1		4	4	2	4	1		55	3	2	1	1	3	5	2	3	5	4	5	1	4	2	3	4	3	5				1	Curious		1	1	1					1	1	1
1	2	2	27	1		5	5	1	7	1		60	1	4	1	1	3	4	2	3	4	3	4	1	2	3	5	5	5	5	1			1	Unsure of the long-term health consequences of consuming lab grown meat.	1	1		1										1
1	2	2	26	2		1	1	1	7	1		22	2	3	1	1	2	5	2	1	4	3	5	1	2	2	3	3	3	4	1	1				1	1		1				1	1		1
1	2	2	51	1		3	3	1	6	1		30	3	3	1	1	2	3	1	1	1	3	5	1	4	1	2	2	1	3	1						1	1	1				1	1	1	1
1	2	2	18	1		3	2	1	4	1		38	2	4	1	1	3	3	1	2	4	4	3	1	5	1	2	4	4	3			1			1	1	1	1					1	1	1
1	2	2	32	2		7	7	2	5	1		20	2	5	1	1	4	5	4	4	5	4	3	1	4	4	5	5	4	4	1		1			1	1	1	1										1
1	2	2	28	2		2	2	3	4	1		41	2	4	1	1	3	5	3	4	5	4	3	1	2	4	4	5	2	5				1	Takes jobs from farmers	1	1	1	1										1
1	2	2	28	2		6	7	2	4	1		50	2	3	1	1	4	4	2	2	4	5	5	1	5	3	3	3	2	3			1			1	1	1	1				1	1	1	1
1	2	2	25	1		3	3	1	6	5		0	1	1	1	1	2	3	1	1	1	3	5	1	2	4	5	6	5	1			1									1	1	1
1	2	2	27	1		5	5	1	4	1		40	2	5	1	1	5	5	3	2	4	4	5	1	1	2	2	3	3	5			1	1	Dependent on if it supplies adequate nutrition	1	1	1	1				1	1	1	1
1	2	2	20	2		2	2	1	4	1		40	1	3	1	1	3	4	1	1	1	3	4	1	3	1	1	1	2	3			1			1	1	1	1				1	1	1	1	1	1
1	2	2	44	1		5	5	6	6	3		20	1	2	1	1	2	3	2	2	1	3	2	1	4	2	3	2	2	2				1	Geneic concerns	1							1	1	1	1	1	1
1	2	2	36	2		5	5	1	6	1		71	2	3	1	1	2	5	3	3	3	4	4	1	4	2	3	3	2	4			1			1	1	1	1						1	1
1	2	2	36	1		5	5	1	5	1		30	2	4	1	1	3	5	1	2	4	4	5	1	2	2	3	3	2	3			1			1	1	1	1				1	1	1	1	1
1	2	2	24	1		7	7	1	7	1		10	2	5	1	1	3	4	2	2	4	3	3	1	5	2	2	2	2	3			1				1		1					1		1
1	2	2	56	2		7	7	4	7	1		40	2	4	1	1	2	4	1	1	3	2	5	1	4	1	2	2	1	2			1			1	1	1	1				1	1	1	1	1
1	2	2	18	1		3	3	1	6	1		35	1	5	1	1	4	5	2	1	4	4	4	1	2	1	2	2	1	4			1			1	1	1	1				1	1	1	1
1	2	2	22	2		1	1	1	3	1		49	2	5	1	1	2	4	1	1	4	3	4	1	2	2	3	3	4	5			1			1	1		1				1			1
1	2	2	27	2		5	6	3	4	1		38	2	2	1	1	4	5	1	1	5	5	5	1	5	2	3	4	4	3			1			1	1	1	1				1	1	1	1
1	2	2	34	2		1	1	1	7	1		25	2	4	1	1	3	4	2	3	4	3	4	1	2	2	3	4	4	4			1			1	1	1	1				1	1	1	1
1	2	2	31	2		1	1	2	5	1		20	2	5	1	1	3	5	2	1	2	3	5	1	4	2	3	2	4	3	1		1			1	1	1	1				1	1	1	1
1	2	2	25	2		3	3	1	4	1		39	2	2	1	1	3	5	2	2	4	4	4	1	2	2	3	4	2	3	1					1	1	1	1				1	1	1	1
1	2	2	23	1		5	5	2	5	1		60	3	3	1	1	3	4	3	3	2	3	4	1	2	2	2	2	2	4			1	1	We are unable to see future effects of eating synthetic meat	1	1	1	1				1	1	1	1
1	2	2	26	2		2	2	1	4	1		52	2	3	1	1	3	5	1	1	4	4	4	1	4	1	3	2	1	2			1			1	1	1	1				1	1	1	1
1	2	2	33	1		4	4	3	6	1		50	1	4	1	1	5	5	2	4	5	4	4	1	2	2	3	4	2	4			1			1	1	1	1				1	1	1	1
1	2	2	29	1		5	6	4	5	1		50	2	5	1	1	3	5	2	5	5	3	4	1	4	5					1			1	i just doesnt seem right	1	1	1	1										1
1	2	2	24	2		5	7	3	6	1		60	1	3	1	1	3	4	2	3	4	4	4	1	4	4	4	4	3	4			1				1	1	1					1		1
1	2	2	33	1		5	5	1	6	1		61	3	3	1	1	2	3	2	1	4	4	4	1	4	2	3	3	3	3			1			1	1	1	1				1	1	1	1
1	2	2	29	1		7	2	3	4	1		50	1	3	1	1	5	5	5	5	5	5	3	1	3	5					1	1	1			1	1		1										1
1	2	2	29	2		4	3	1	7	1		39	2	4	1	1	3	4	4	2	4	4	4	1	3	2	3	3	2	3	1		1			1	1	1	1					1	1	1
1	2	2	18	1		2	1	1	4	1		71	1	5	1	1	4	5	4	1	5	5	1	1	1	2	4	5	3	4	1		1			1	1	1	1				1		1
1	2	2	20	1		4	4	1	4	1		69	2	5	1	1	3	4	2	3	3	5	2	1	4	2	5	4	1	4			1			1	1	1	1				1	1	1	1
1	2	2	29	2		5	3	3	6	1		49	3	3	1	1	2	4	3	3	4	4	4	1	4	2	3	3	3	3			1			1	1	1	1				1	1	1	1
1	2	2	25	2		4	4	1	6	1		40	3	4	1	1	2	4	1	1	4	3	5	1	1	1	2	2	1	3			1			1	1	1	1					1		1
1	2	2	26	2		1	1	3	1	1		40	1	2	1	1	2	4	2	1	2	3	5	1	2	1	1	2	1	5			1			1	1	1	1					1		1
1	2	2	25	2		3	3	2	5	1		30	1	2	1	1	3	4	2	2	4	4	3	1	3	2	3	3	2	3			1			1	1	1	1					1	1	1
1	2	2	33	1		1	1	1	6	1		50	2	4	1	1	3	5	1	1	4	3	5	1	4	2	3	3	2	3			1			1	1	1	1				1	1	1	1
1	2	2	20	1		6	6	3	6	1		60	2	4	1	1	2	5	2	2	3	4	2	1	2	1	2	2	3	2				1	No	1	1	1	1				1	1	1	1
1	2	2	23	2		3	3	2	4	1		60	2	5	1	1	4	5	2	3	5	5	4	1	2	4	5	4	5	5			1			1	1	1	1										1
1	2	2	25	1		2	2	4	6	1		41	1	2	1	1	2	4	1	2	3	3	4	1	2		2	2	2	3						1	1	1							1	1
1	2	2	30	3	Still figuring out my gender identity for sure	2	2	1	4	1		50	1	2	1	1	3	5	3	2	4	3	4	1	4	2	2	3	3	3			1			1	1	1	1				1	1	1	1
1	2	2	19	1		1	1	2	4	1		40	2	4	1	1	3	4	2	3	3	3	3	1	2	2	4	3	2	3			1			1		1	1						1	1
1	2	2	22	2		4	4	2	6	4		0	2	4	1	1	4	5	4	3	5	5	4	1	3	5					1		1									1							1
1	2	2	26	2		2	1	2	5	1		60	2	2	1	1	4	5	2	2	3	3	5	1	5	1	3	2	3	2				1	Rammifications of something created on a petri dish		1		1					1		1
1	2	2	29	1		7	7	2	4	1		50	2	5	1	1	5	5	3	2	5	5	4	1	2	2	3	4	3	4			1				1	1	1					1	1	1
1	2	2	29	2		9	1	1	4	1		50	3	3	1	1	2	2	3	2	5	5	5	1	5	3	3	3	1	3			1			1	1	1	1				1	1	1	1
1	2	2	26	1		7	3	4	6	1		60	1	2	1	1	2	2	1	2	2	2	3	1	4	1	2	2	2	2			1			1	1	1					1	1	1
1	2	2	24	2		4	4	2	6	5			1	1	1	1	1	2	1	1	1	3	4	1	4	2	3	2	2	2	1											1		1	1	1
1	2	2	24	1		5	4	1	4	1		70	2	3	1	1	4	5	2	2	3	3	4	1	1	1	2	1	1	4	1		1			1	1	1	1				1	1	1	1
1	2	2	49	2		2	2	3	6	1		71	2	5	1	1	5	5	3	5	5	5	4	1	1	5					1		1			1	1	1	1										1
1	2	2	21	1		4	4	1	4	1		71	2	5	1	1	3	4	1	1	4	3	4	1	5	1	2	2	1	3			1			1	1	1	1				1	1	1	1
1	2	2	58	1		6	4	1	6	6	Ocassionally Meat-eating, but mostly vegetarian	3	2	2	1	1	3	5	4	3	5	4	5	1	2	5						1		1	Concern over as yet unknown risks	1	1		1										1
1	2	2	21	1		3	3	1	4	1		60	1	2	1	1	2	5	2	3	4	4	5	1	2	1	3	4	2	4			1				1	1	1				1	1	1	1
1	2	2	29	1		7	7	2	6	1		40	2	5	1	1	3	4	2	2	3	3	3	1	2	2	3	3	1	3						1	1	1	1				1	1	1	1
1	2	2	32	1		3	3	3	6	1		65	1	1	1	1	2	5	1	1	1	3	5	1	5	1	1	1	1	2						1	1	1	1				1	1	1	1
1	2	2	40	1		1	1	6	6	1		60	2	3	1	1	3	3	2	2	4	4	4	1	2	2	3	3	2	2			1			1	1	1	1				1	1	1	1
1	2	2	24	2		3	7	3	6	1		85	1	1	1	1	2	5	3	2	4	5	4	1	1	1	2	2	3	4			1			1	1	1	1					1	1	1
1	2	2	35	1		3	3	2	7	1		30	3	4	1	1	2	4	1	1	1	3	5	1	4	1	1	1	2	2	1		1				1	1	1					1	1	1
1	2	2	50	2		5	5	2	6	1		61	2	5	1	1	3	3	3	3	4	4	3	1	4	3	4	4	3	4				1	Not out long enough to know if there is any bad effects from it.	1	1		1										1
1	2	2	26	2		5	1	2	5	1		80	2	5	1	1	5	5	1	1	5	5	3	1	5	5							1			1	1	1	1										1
1	2	2	47	2		8	8	6	7	1		30	2	2	1	1	3	4	2	2	4	3	5	1	4	3	3	3	2	2	1		1			1	1	1	1							1
1	2	2	29	1		6	6	3	4	1		41	2	4	1	1	3	5	4	5	4	3	2	1	2	3	4	4	4	5	1		1			1	1	1	1							1
1	2	2	27	1		5	5	1	6	1		10	1	4	1	1	3	5	1	3	5	5	3	1	5	4	4	4	5	3			1					1	1										1
1	2	2	33	1		6	6	2	4	1		51	2	5	1	1	5	5	3	2	5	4	3	1	3	3	3	3	4	5	1		1			1	1	1	1										1
1	2	2	64	2		5	7	1	4	1		30	3	4	1	1	2	4	1	1	2	3	5	1	2	1	3	3	2	4			1			1	1	1	1				1	1	1	1
1	2	2	31	1		1	1	1	4	1		60	2	4	1	1	2	4	1	3	2	3	5	1	5	1	1	1	1	2			1			1	1	1	1				1	1	1	1
1	2	2	20	1		2	2	3	6	1		50	1	1	1	1	2	5	2	1	4	3	5	1	4	1	2	2	1	2	1						1		1					1		1
1	2	2	22	2		1	1	1	4	1		40	1	1	1	1	3	4	3	2	2	4	5	1	4	2	2	3	3	4			1			1	1	1	1				1	1	1	1	1
1	2	2	31	1		2	2	3	6	1		50	1	2	1	1	3	4	2	1	4	4	4	1	4	1	3	3	1	3	1					1	1	1	1				1	1	1	1	1	1
1	2	2	28	1		4	4	2	4	1		50	1	1	1	1	3	5	1	1	3	5	5	1	5	1	2	3	1	3						1	1	1	1				1	1	1	1	1	1
1	2	2	32	1		8	1	3	6	1		69	1	1	1	1	2	1	2	2	1	1	3	1	5	1	1	1	1	2			1			1		1	1				1			1
1	2	2	1994	2		5	5	1	4	1		31	1	2	1	1	3	4	1	2	4	3	4	1	4	2	3	2	3	4			1			1		1	1				1		1
1	2	2	31	1		7	7	6	7	1		34	1	2	1	1	5	4	3	4	5	5	3	1	2	4	4	4	2	4			1			1	1	1	1										1
1	2	2	65	2		5	6	2	5	1		40	2	3	1	1	3	5	3	5	5	5	5	1	4	5							1			1	1	1	1				1	1	1	1
1	2	2	31	2		3	3	2	6	1		14	1	2	1	1	3	4	1	1	4	4	5	1	5	1	2	2	2	3				1	high cost	1	1	1	1				1	1	1	1
1	2	2	37	2		5	5	5	6	1		42	2	5	1	1	5	5	1	1	5	5	3	1	2	2	4	4	4	4			1	1	side effects	1	1	1	1							1
1	2	2	32	1		1	1	1	6	4			2	2	1	1	3	3	1	1	1	3	5	1	4	2	2	2	2	2			1									1	1	1	1	1	1	1
1	2	2	28	1		2	2	3	6	1		50	3	3	1	1	3	4	2	2	4	3	4	1	2	2	2	3	2	3			1			1	1	1	1				1	1	1	1
1	2	2	29	2		7	7	4	6	1		30	2	5	1	1	3	5	2	3	5	4	1	1	4	4	5	4	3	3	1		1			1	1	1	1										1
1	2	2	20	2		2	2	1	4	1		50	2	3	1	1	3	4	1	1	2	4	4	1	4	2	2	2	1	3	1		1			1	1	1	1				1	1	1	1
1	2	2	46	2		3	3	5	7	1		12	2	5	1	1	2	5	2	3	5	4	3	1	4	3	4	4	5	4				1	Processed	1	1	1	1				1	1	1	1
1	2	2	33	2		5	3	1	4	1		31	2	5	1	1	3	3	2	2	2	4	5	1	4	1	3	2	2	4				1	Would want to know the exact process to make sure I know what's going in my body	1	1		1						1	1
1	2	2	27	1		3	3	3	5	1		50	2	3	1	1	3	4	2	1	2	3	3	1	4	2	3	3	2	3			1			1	1	1	1					1	1	1
1	2	2	47	1		5	5	5	6	1		30	2	4	1	1	3	4	2	3	3	3	3	1	4	2	2	3	2	2			1			1	1	1	1				1	1	1	1
1	2	2	51	1		4	4	2	5	1		35	1	1	1	1	3	5	1	3	5	5	5	1	5	3	5	4	2	4			1			1	1	1	1				1	1	1	1
1	2	2	22	1		5	5	1	3	6	my diet is altered i follow a strict diet for muscle building i eat whatever i want whenever i want. i like all foods i am not to picky & would try new things, i do cut alot of bread out & try to keep salt & sugar low.	50	1	1	1	1	3	3	3	3	3	4	1	1	5	3	3	4	4	5			1	1	health concearns & it being made in a test lab do not trust or like things of the sort but it maybe good for 3rd world countrys where there are starving people & children, but i would still be concerned about side effects.	1	1		1			1	1	1		1	1	1	1
1	2	2	27	2		8	8	4	6	1		39	2	5	1	1	2	4	2	2	4	4	4	1	5	2	2	2	3	3			1			1		1	1				1		1	1
1	2	2	29	1		1	1	1	4	5			2	5	1	1	1	1	1	1	1	1	5	1	1	1	1	1	1	3	1		1									1	1	1	1	1
1	2	2	22	1		5	5	2	4	1		70	1	3	1	1	5	5	2	4	4	3	3	1	4	3	3	4	3	4	1		1			1	1	1	1						1	1
1	2	2	22	1		4	4	1	6	1		35	1	2	1	1	4	4	1	1	3	4	4	1	5	1	1	1	1	3	1		1				1		1					1		1
1	2	2	22	1		5	3	1	6	1		81	2	3	1	1	2	5	2	2	4	4	5	1	4	2	3	4	3	4			1			1	1	1	1				1	1	1	1
1	2	2	34	2		4	4	3	7	1		35	2	4	1	1	3	5	1	2	2	4	4	1	4	2	2	3	2	2			1	1	$	1	1	1	1				1	1	1	1
1	2	2	42	1		5	6	3	6	1		30	1	3	1	1	3	3	1	2	2	3	3	1	1	1	2	3	1	3			1			1	1	1	1				1	1	1
1	2	2	34	2		8	9	3	4	1		50	2	5	1	1	3	4	3	4	5	5	2	1	4	2	4	4	3	4	1	1	1	1	seems creepy	1	1	1	1										1
1	2	2	35	1		7	7	4	6	1		40	2	3	1	1	3	5	2	2	5	5	4	1	5	3	4	5	2	4			1			1	1	1	1					1		1
1	2	2	46	1		8	8	5	6	1		23	1	2	1	1	3	3	1	1	3	3	3	1	4	1	3	2	1	4			1			1	1	1	1					1	1	1
1	2	2	50	1		7	7	4	4			61	2	4	1	1	5	5	5	2	5	5	4	1	4	4	4	5	4	5			1			1	1	1	1					1
1	2	2	47	2		7	7	4	6	1		30	2	5	1	1	3	5	3	2	5	3	5	1	4	3	5	5	5	3			1			1	1	1	1							1
1	2	2	21	2		1	1	1	6	4		5	1	2	1	1	3	4	1	1	2	4	4	1	4	1	5	2	4	2			1			1	1						1	1	1	1
1	2	2	40	2		1	1	4	7	1		20	2	4	1	1	4	5	2	3	5	5	3	1	2	1	3	3	2	4			1			1	1	1	1				1	1	1	1
1	2	2	30	1		6	6	4	6	1		30	1	2	1	1	4	5	2	3	5	4	3	1	2	3	4	4	4	5			1	1	Weird	1	1	1	1										1
1	2	2	26	2		3	3	3	6	1		49	1	4	1	1	3	5	3	3	4	4	3	1	5	4	5	5	4	5			1	1	Doesn't seem as natural/organic		1	1	1										1
1	2	2	47	2		5	3	5	6	1		40	2	3	1	1	2	4	2	2	5	4	5	1	2	3	3	3	2	3			1			1	1	1	1				1	1	1	1
1	2	2	27	1		3	4	6	6	1		46	2	4	1	1	2	4	2	2	4	4	4	1	4	2	3	4	2	3			1			1	1	1	1					1	1	1
1	2	2	65	2		9	9	2	6	1		29	2	3	1	1	3		1	3	4		4	1	4	3	4	4	3	3			1			1	1	1	1										1
1	2	2	53	1		7	7	3	6	1		30	3	4	1	1	2	5	2	3	5	4	3	1	1	1	3	4	2	5			1			1	1	1	1					1	1	1
1	2	2	28	1		1	1	1	4	1		70	2	5	1	1	4	5	2	4	5	5	4	1	2	2	3	3	4	4			1	1	Carcinogens	1	1	1	1				1	1	1	1
1	2	2	31	2		2	2	6	6	1		20	2	4	1	1	3	4	2	1	1	4	5	1	3	1	2	2	2	3			1			1	1	1	1					1	1	1
1	2	2
1	2	2	26	2		3	3	5	6	1		45	2	5	1	1	4	5	3	5	5	3	2	1	2	5							1			1	1	1	1				1	1	1	1
1	2	2
1	2	2	28	1		1	1	2	6	1		30	2	5	1	1	3	4	1	1	4	3	5	1	1	1	1	1	1	5			1				1	1	1				1	1	1	1
1	2	2	47	2		5	5	2	7	2		4	2	5	1	1	2	4	2	3	4	3	4	1	1	2	3	2	2	4	1		1			1	1							1
1	2	2	28	2		5	5	3	4	1		40	2	5	1	1	5	5	3	5	5	5	4	1	4	5					1		1			1	1	1	1										1
1	2	2	52	2		3	3	2	5	1		35	2	3	1	1	2	5	2	2	4	3	5	1	4	2	3	3	3	3			1			1	1	1	1				1	1	1	1
1	2	2	21	2		1	1	5	6	5		0	2	4	1	1	3	4	4	5	5	4	5	1	4	5							1									1							1
1	2	2	33	1		5	4	2	5	1		25	2	5	1	1	5	5	2	3	4	5	5	1	2	3	5	4	3	4		1	1			1	1	1	1							1
1	2	2	26	2		5	5	3	5	1		40	2	4	1	1	5	5	1	1	5	5	2	1	5	3	4	3	3	2			1			1	1	1	1					1		1
1	2	2	49	2		3	3	3	7	1		19	2	2	1	1	2	3	1	2	5	4	5	1	1	3	4	2	4	4			1	1	imagining huge vats of pink flesh:(	1	1	1	1				1	1	1	1
1	2	2	20	1		5	5	5	6	1		90	2	5	1	1	4	5	4	4	4	4	3	1	4	3	4	4	5	4			1				1	1	1					1	1	1
1	2	2	23	1		5	5	2	6	1		45	3	5	1	1	3	4	1	3	3	3	5	1	4	1	1	3	1	3			1			1	1	1	1				1	1	1	1	1	1
1	2	2	35	2		8	8	6	5	1		60	2	4	1	1	3	5	2	3	4	4	5	1	5	1	2	2	1	4			1			1	1	1	1				1	1	1	1
1	2	2	26	2		8	8	3	6	1		50	1	2	1	1	4	5	3	5	5	5	4	1	4	4	4	5	4	4	1		1			1	1	1	1										1
[truncated: 11 more columns]
